# Supplementary material for: FtsN maintains active septal cell wall synthesis by forming a processive complex with the septum-specific peptidoglycan synthases in E. coli
Source: PubMed Central journal article supplement (PMC9525312; doi:10.1038/s41467-022-33404-8), 2022-09-30
Supplement: 41467_2022_33404_MOESM1_ESM.pdf [file 41467_2022_33404_MOESM1_ESM.pdf]

# Supplementary Information

## **FtsN maintains active septal cell wall synthesis by forming a processive complex with the septum-specific peptidoglycan synthases in *E. coli***

Zhixin Lyu<sup>1</sup>, Atsushi Yahashiri<sup>2</sup>, Xinxing Yang<sup>1,3</sup>, Joshua W. McCausland<sup>1</sup>, Gabriela M. Kaus<sup>2</sup>, Ryan McQuillen<sup>1</sup>, David S. Weiss<sup>2\*</sup>, Jie Xiao<sup>1\*</sup>

<sup>1</sup>Department of Biophysics and Biophysical Chemistry, Johns Hopkins School of Medicine, Baltimore, MD 21205, USA.

<sup>2</sup>Department of Microbiology and Immunology, University of Iowa Carver College of Medicine, Iowa City, IA 52242, USA.

<sup>3</sup>Current address: The Chinese Academy of Sciences Key Laboratory of Innate Immunity and Chronic Disease, School of Basic Medical Sciences, Division of Life Sciences and Medicine, University of Science and Technology of China, Hefei, China.

\*Corresponding authors: david-weiss@uiowa.edu, xiao@jhmi.edu

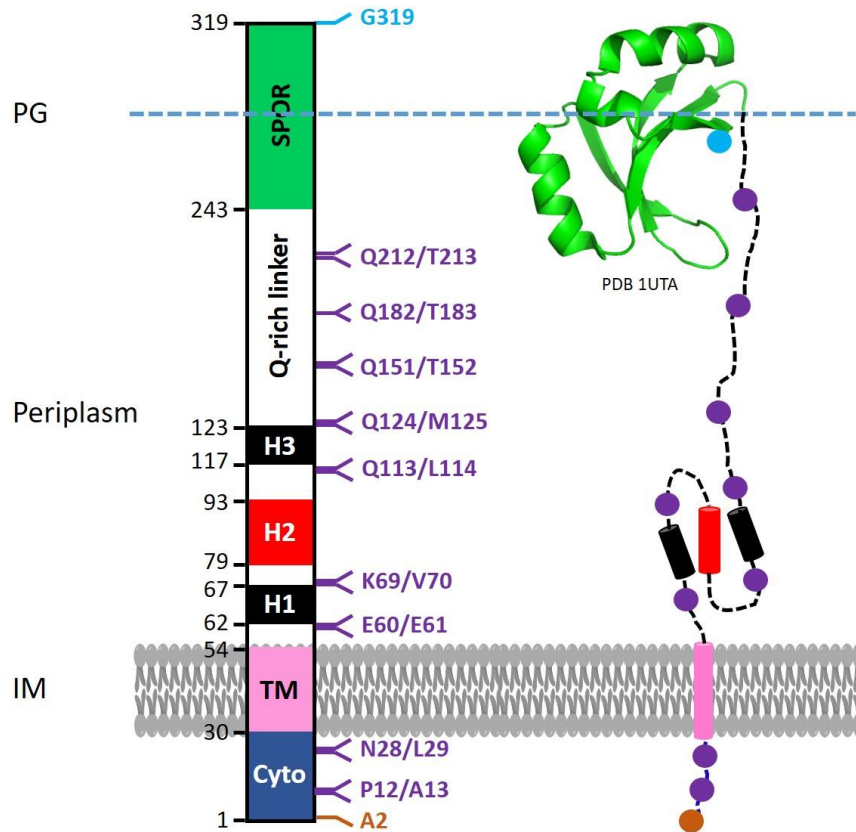

31  
32

33 **Supplementary Fig. 1. Sites used for mNG fusions to FtsN.**

34 mNG was fused to the N-terminus (orange), C-terminus (cyan) or inserted at internal  
 35 positions (purple) of FtsN as shown by the amino acid numbers (left) and corresponding  
 36 dots (right). The domain structure of FtsN is illustrated with different colors, which are the  
 37 N-terminal cytoplasmic domain (FtsN<sup>Cyto</sup>, blue), the transmembrane domain (FtsN<sup>TM</sup>, pink),  
 38 the periplasmic essential domain (FtsN<sup>E</sup>) containing helices H1 (black), H2 (red), and H3  
 39 (black) with H2 being essential for FtsN function in cell division, and the C-terminal SPOR  
 40 domain (PDB 1UTA<sup>1</sup>, FtsN<sup>SPOR</sup>, green). Numbers by the left side of the domain regions  
 41 refer to the amino acid range of different domains.

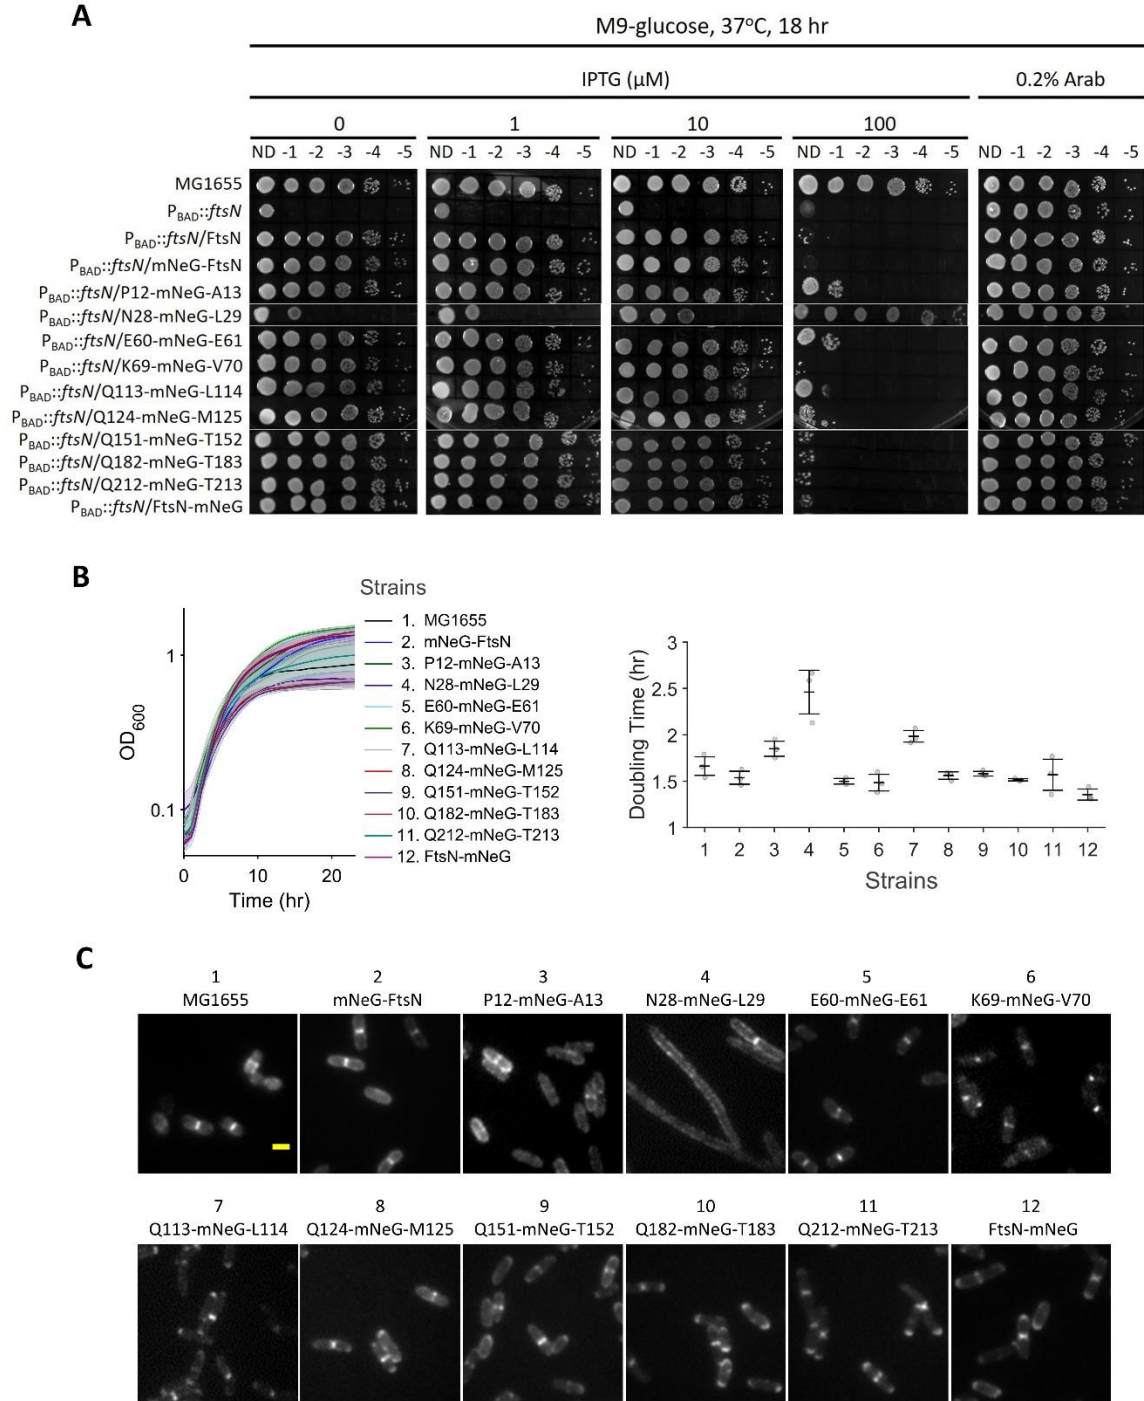

42  
43  
44  
45  
46  
47  
48  
49

**Supplementary Fig. 2. Characterization of mNG-fused FtsN constructs.**

(A) To test for complementation on plates, cultures were serially diluted 10-fold, spotted onto M9-glucose plates containing increasing IPTG concentrations, and incubated at 37°C for 18 hrs. The protein expressed under IPTG control is indicated for each strain. M9-glucose plates containing 0.2% Arab to express chromosomal wildtype (WT) FtsN in each strain background serve as the positive control. Data were combined from two

50 experiments. ND: no dilution. (B) Growth curves of MG1655 and FtsN-depletion strains  
51 expressing various fusions of mNG to FtsN in M9-glucose minimal media with no IPTG  
52 (i.e., leaky expression) at 30°C (mean  $\pm$  s.e.m.,  $n = 3$  biological replicates). The doubling  
53 time was calculated from the growth curves (mean  $\pm$  standard deviation,  $n = 3$  biological  
54 replicates). The numbers on the x-axis are the strain numbers, which correspond to the  
55 strains listed left sequentially. (C) Septal localization of various mNG fusions to FtsN.  
56 MG1655 cells (no FtsN fusion) were imaged by immunofluorescence staining. Cells from  
57 other strains were grown in M9-glucose minimal media without induction. Experiment was  
58 repeated three times with similar results. Scale bar, 1  $\mu$ m. Source data are provided as a  
59 Source Data file.

60  
61  
62  
63  
64  
65  
66  
67  
68  
69  
70  
71  
72  
73  
74  
75  
76  
77  
78  
79  
80  
81  
82  
83  
84

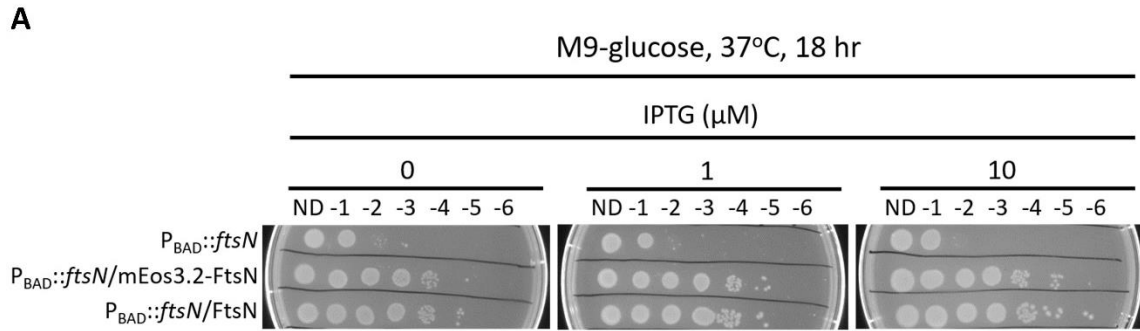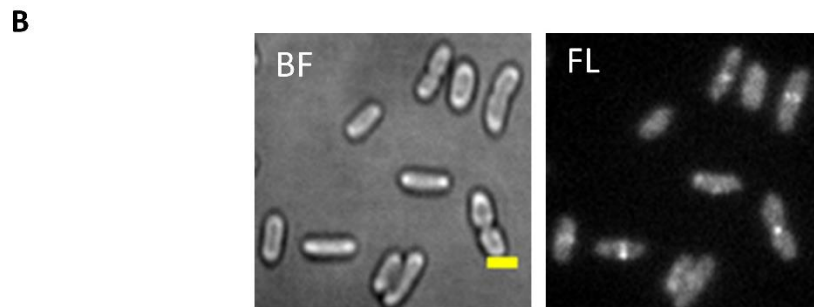

85

86

87 **Supplementary Fig. 3. Characterization of the mEos3.2-FtsN fusion strain.**

88 (A) To test for complementation on plates, cultures were serially diluted 10-fold, spotted  
 89 onto M9-glucose plates containing increasing IPTG concentrations, and incubated at 37°C  
 90 for 18 hrs. The protein expressed under IPTG control is indicated for the strain. ND: no  
 91 dilution. (B) Integrated green fluorescence images of mEos3.2-FtsN (Strain EC4443 in  
 92 Supplementary Table 1) were acquired by excitation at 488-nm without UV activation.  
 93 Please note that mEos3.2 is not as bright as GFP or mNG when serving as a green  
 94 fluorescent protein. Cells were grown in M9-glucose minimal media without induction.  
 95 Experiment was repeated three times with similar results. Scale bar, 1  $\mu\text{m}$ .

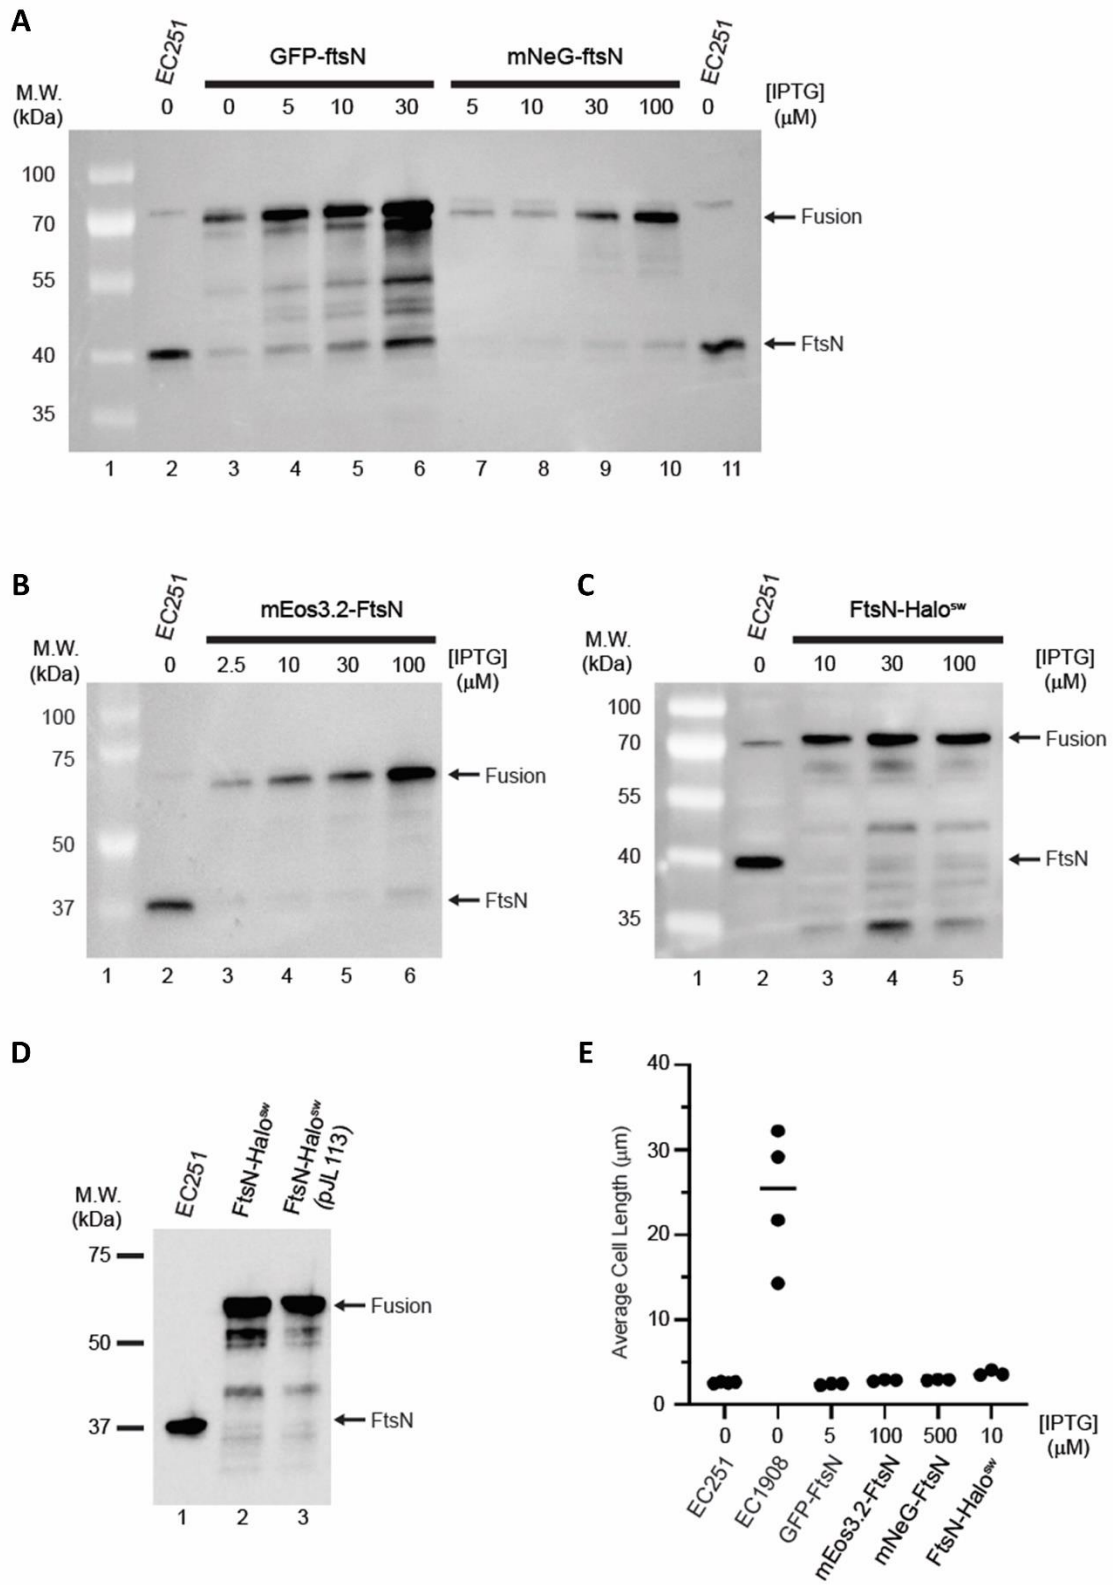

98 **Supplementary Fig. 4. Validation of FtsN fusions with mEos3.2, GFP, mNG and Halo**  
99 **integrated into a chromosomal phage attachment site in an FtsN-depletion strain**  
100 **background (EC1908).**

101 (A-D) Western blots with anti-FtsN<sup>peri</sup> sera showing the expression levels and stability of  
102 fusion proteins at different induction conditions. For all imaging experiments, the IPTG  
103 induction level was as shown in (E). Size markers are indicated to the left of each blot.  
104 Blots are representative of at least two trials. (E) Average cell length from 4 trials with  $\geq$   
105 200 cells measured per trial. Cells were grown at room temperature in M9-glucose with  
106 IPTG as indicated to OD<sub>600</sub>  $\sim$ 0.35 before sampling for Western blotting or fixing for  
107 microscopy. The strains shown in (A-C) and (E) are EC251 (WT FtsN), EC1908 (P<sub>BAD</sub>::*ftsN*  
108 for FtsN depletion), EC4240 (GFP-FtsN), EC4443 (mEos3.2-FtsN), EC4564 (mNG-FtsN),  
109 and EC5234 (FtsN-Halo<sup>SW</sup>, insertion at E60-E61). Strains shown in (D) are EC251,  
110 EC5234, and EC5606. See more strain details in Supplementary Table 1. Source data are  
111 provided as a Source Data file.

112  
113

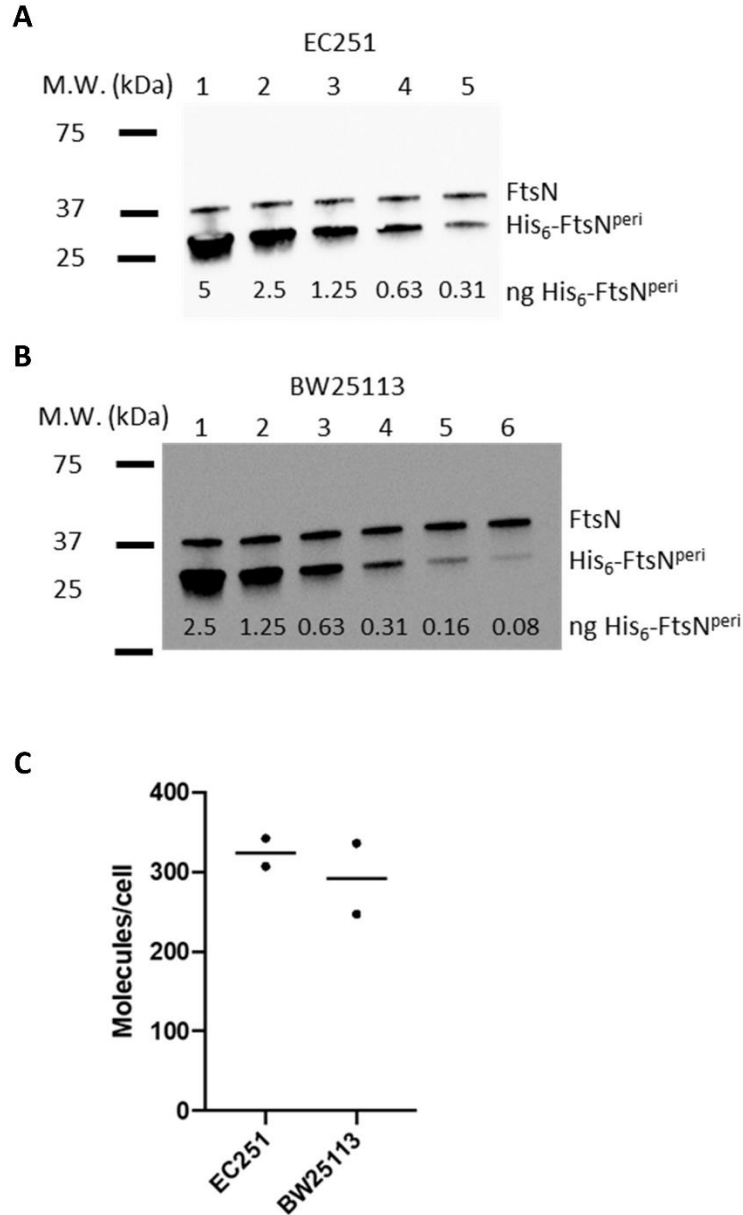

114  
 115  
 116  
 117  
 118  
 119  
 120  
 121  
 122  
 123  
 124  
 125  
 126

**Supplementary Fig. 5. Quantitation of FtsN copy number in MG1655 and BW25113 strains.**

(A and B) Representative Western blots using anti-FtsN<sup>peri</sup> sera. The amount of FtsN in  $1.9 \times 10^7$  cells of EC251 (A) and  $1.7 \times 10^7$  cells of BW25113 (B) was compared to a standard curve generated by diluting purified His<sub>6</sub>-FtsN periplasmic domain into the cell extracts. In the blots shown, the signal intensity of native FtsN in EC251 and BW25113 corresponded to 0.35 and 0.38 ng of His<sub>6</sub>-FtsN<sup>peri</sup>, respectively. (C) Average number of FtsN molecules per cell (bar) in two experiments (dots) for each strain. This calculation takes into account differences in molecular mass (FtsN = 35.793 kDa, His<sub>6</sub>-FtsN<sup>peri</sup> = 31.856 kDa) and the number of cells loaded in each lane. Source data are provided as a Source Data file.



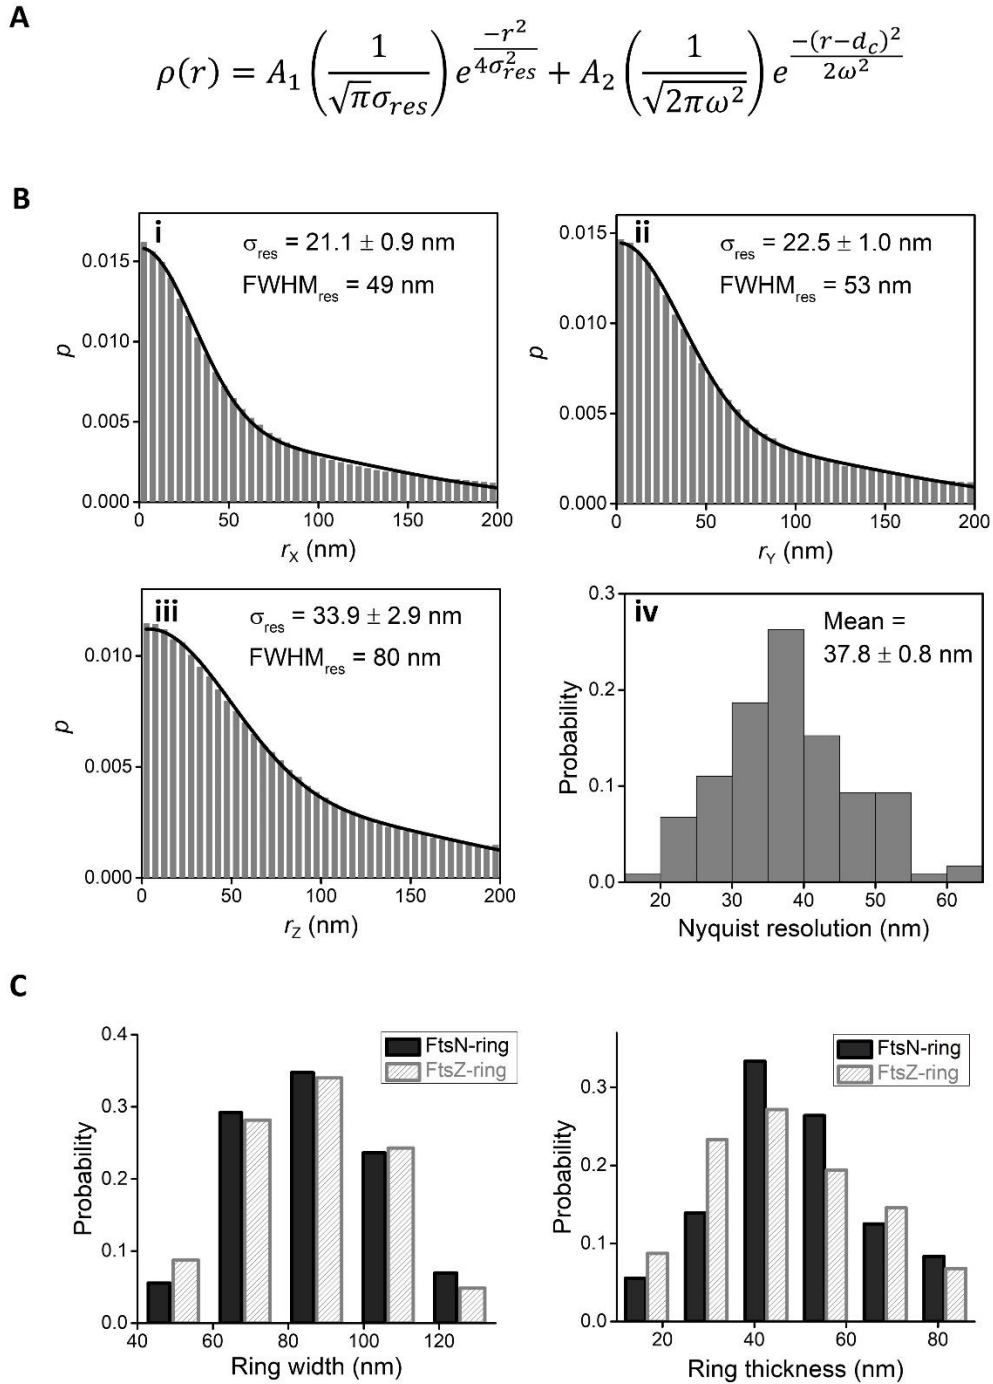

127

128 **Supplementary Fig. 6. Spatial resolution of 3D SMLM imaging and dimensions of**  
 129 **FtsN- and FtsZ-rings.**

130 (A) Equation describing the distribution ( $\rho$ ) of pair-wise distances ( $r$ ) between nearest  
 131 neighbors in adjacent frames of live-cell SMLM data<sup>2</sup>. The first term represents the  
 132 distribution expected for repeat observations of the same molecule with localization  
 133 precision  $\sigma_{res}$ . The second term with Gaussian parameters  $\omega$  and  $d_c$  accounts for the  
 134 possibility that nearest neighbors in adjacent frames may not arise from the same

135 molecule. (B) i-iii, Distributions of pair-wise distances between nearest neighbors in  
136 adjacent frames (gray bars) from SMLM imaging data along the x- (i), y- (ii), and z-axes  
137 (iii). Each histogram was fit using the equation in (A) to generate the black fitted curves.  
138 The achieved localization precision ( $\sigma_{res}$ ) and spatial resolution (expressed as  $FWHM_{res}$ )  
139 determined from these fitted curves are displayed as insets. iv: Distribution of Nyquist  
140 resolution which was calculated as previously described<sup>3</sup>. (C) Distributions of resolution-  
141 deconvolved width (left) and thickness (right) of FtsN-rings (black,  $n = 72$  cells) and FtsZ-  
142 rings (gray,  $n = 103$  cells, data from a previous work<sup>4</sup>). There are no significant differences  
143 in the dimensions between the FtsN- and FtsZ-rings. Source data are provided as a  
144 Source Data file.

145  
146  
147  
148  
149  
150  
151  
152  
153  
154  
155  
156  
157  
158  
159  
160  
161  
162  
163  
164  
165  
166  
167  
168

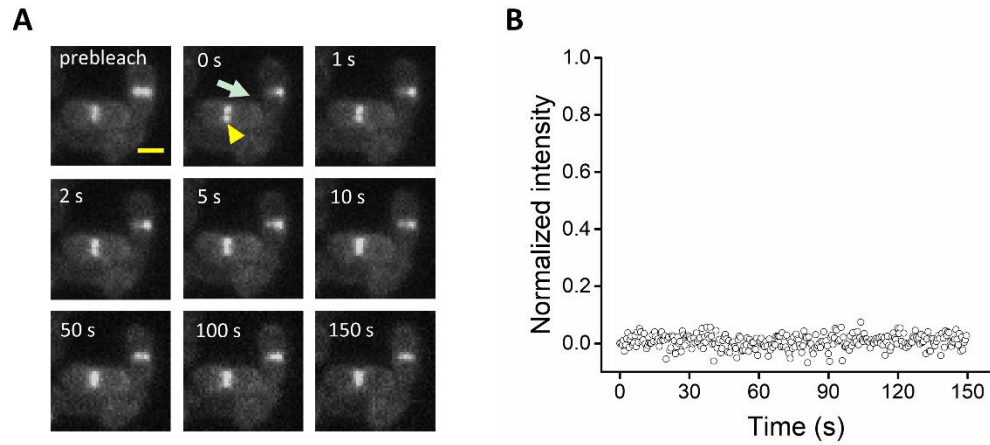

170

171 **Supplementary Fig. 7. FRAP analysis of FtsN.**

172 (A) A representative FRAP imaging sequence showing the recovery of fluorescence after  
 173 the photobleaching of half of the FtsN-ring (cyan arrow, Strain EC4240 in Supplementary  
 174 Table 1). An adjacent cell without photobleaching serves as the control (yellow arrowhead).  
 175 Scale bar, 1  $\mu\text{m}$ . (B) Mean FRAP recovery curve of FtsN from adjacent control cells (gray,  
 176  $n = 6$  cells) showed no fluorescent intensity changed on the time scale of experiment. The  
 177 global photobleaching was corrected by using the fluorescent intensity outside the septum.  
 178 The FRAP curve was close to 0 after subtracting the first acquisition. See more details in  
 179 the Methods section. Source data are provided as a Source Data file.

180

181

182

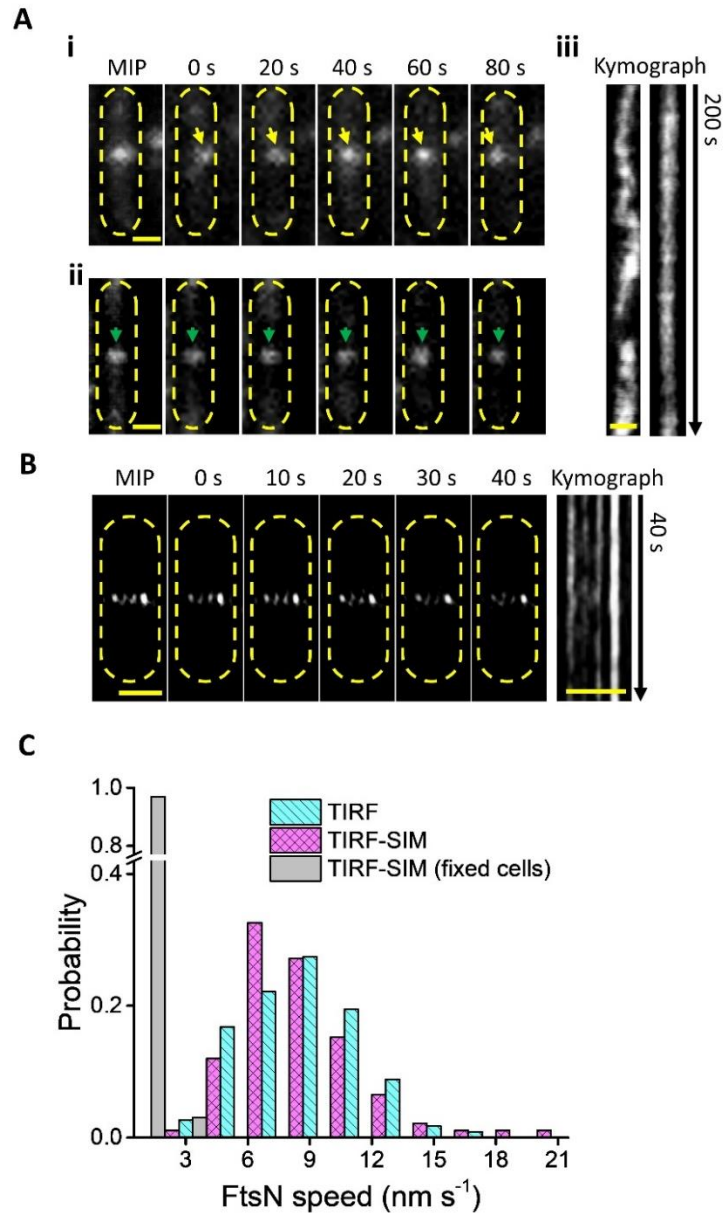

183

184 **Supplementary Fig. 8. FtsN clusters exhibit slow, directional motions.**

185 (A) i-ii, Maximum intensity projection (MIP) and montages from TIRF time-lapse imaging  
 186 of two cells in which a cluster is moving (i, yellow arrow) or immobile (ii, green arrow).  
 187 Scale bars, 500 nm. iii, Kymographs of the cells in (i and ii) computed from the intensity  
 188 along a line across the midcell are shown. Scale bars, 250 nm. (B) Maximum intensity  
 189 projection (MIP) and montages from TIRF-SIM time-lapse imaging of a fixed cell in which  
 190 the clusters are immobile (left). Kymograph computed from the intensity along a line  
 191 across the midcell (right). Scale bars, 500 nm. (C) Distributions of FtsN clusters' moving  
 192 speeds as measured from the kymographs (TIRF, cyan,  $v = 8.6 \pm 0.3 \text{ nm s}^{-1}$ ,  $\mu \pm \text{s.e.m.}$ ,  
 193  $n = 113$  clusters; TIRF-SIM, magenta,  $v = 8.8 \pm 0.3 \text{ nm s}^{-1}$ ,  $\mu \pm \text{s.e.m.}$ ,  $n = 92$  clusters;  
 194 TIRF-SIM (fixed cells), gray,  $v = 0.57 \pm 0.07 \text{ nm s}^{-1}$ ,  $\mu \pm \text{s.e.m.}$ ,  $n = 65$  clusters). Source  
 195 data are provided as a Source Data file.

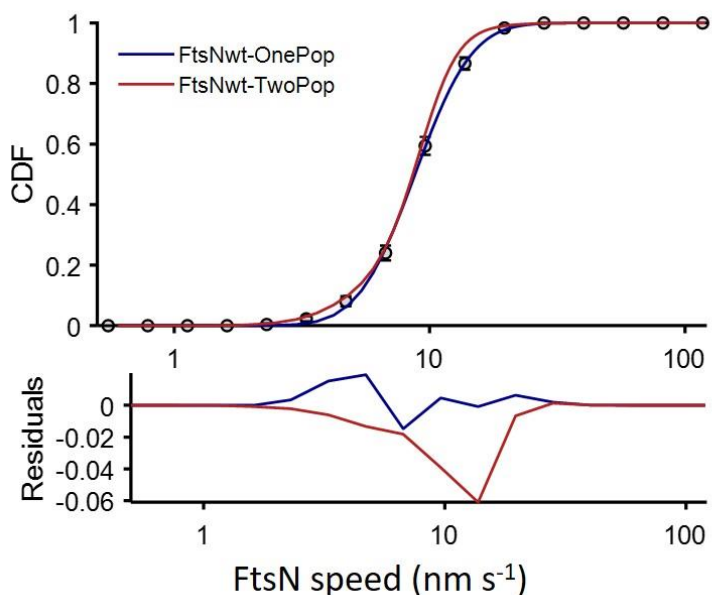

197

198 **Supplementary Fig. 9. Single- or double-population fitting of the cumulative**  
 199 **probability density (CDF) of FtsN's directional moving speed distribution.**

200 Cumulative probability density (CDF) curve of the directional moving speed of FtsN  
 201 molecules in WT MG1655 cells (black dots) was best fit by a single- (blue curve) instead  
 202 of a double- (red curve) population (empirically using log-normal distribution to describe  
 203 the long tail), as indicated by the residuals below. Error bars indicate *s.e.m.* from  
 204 bootstrapping the CDF fitting 200 times.

205

206

207

208

209

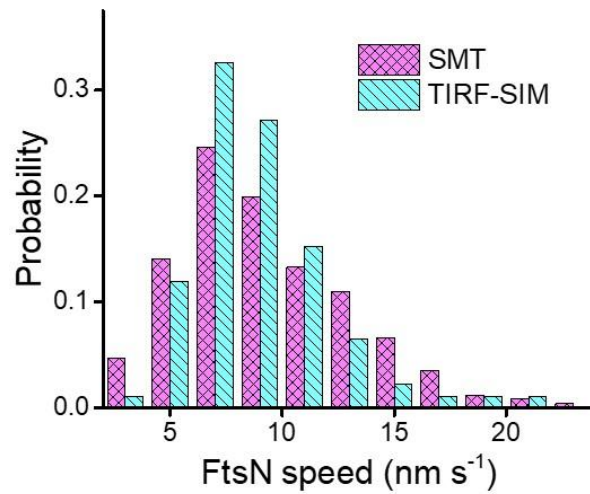

210

211 **Supplementary Fig. 10. Comparison of the speed distributions from SMT and TIRF-**  
 212 **SIM.**

213 Distributions of single FtsN molecules' moving speeds from SMT (magenta,  $n = 256$ ) and  
 214 single FtsN clusters' moving speeds from TIRF-SIM (cyan,  $n = 92$ ). The  $p$ -value of the  
 215 two-sample Kolmogorov-Smirnov (K-S) test for the two distributions is 0.15 ( $>0.05$ ),  
 216 indicating they are statistically identical. Source data are provided as a Source Data file.  
 217

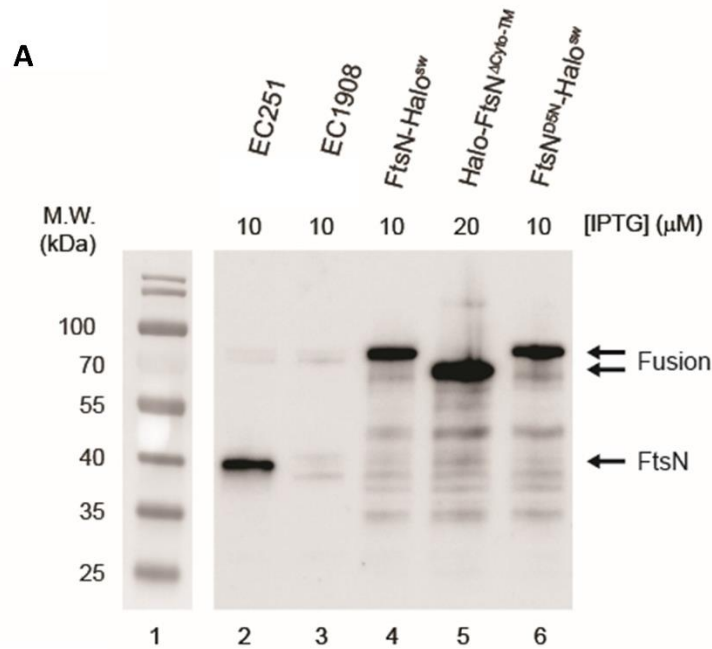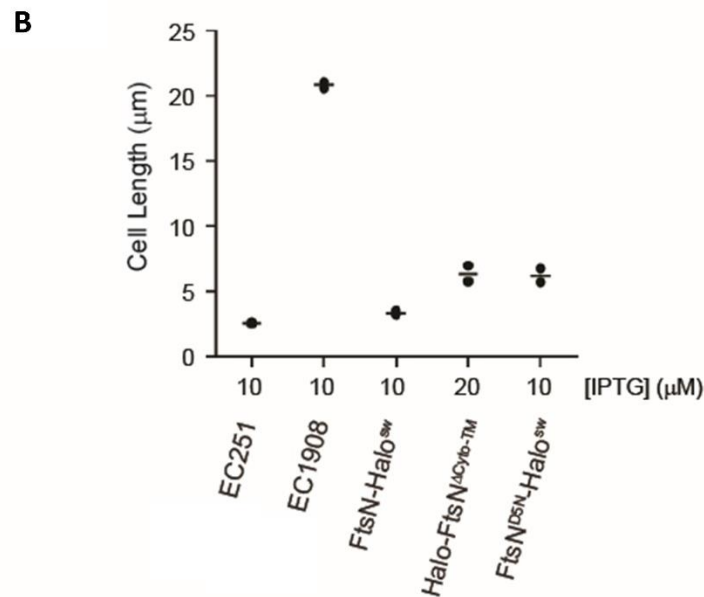

218  
219  
220  
221  
222  
223  
224  
225  
226  
227  
228  
229  
230

**Supplementary Fig. 11. Validation of Halo sandwich fusions to mutant FtsN proteins defective in interaction with FtsA.**

(A) Western blot with anti-FtsN<sup>peri</sup> sera documenting fusion protein expression and effective depletion of native FtsN. Blot was deliberately overexposed to highlight the lack of residual FtsN in these strains. Blot is representative of two experiments. (B) Average cell length from two experiments with  $\geq 200$  cells measured per experiment. Cells were grown in M9-glucose plus IPTG as indicated. Samples were taken for Western blotting and microscopy at  $OD_{600} \sim 0.35$ . Strains shown are EC251 (WT), EC1908 ( $P_{BAD}::ftsM$ ), and EC1908 derivatives that express the indicated *ftsN* fusion under control of a modified *Trc* promoter (EC5234, EC5263, and EC5271). See more strain details in Supplementary Table 1. Source data are provided as a Source Data file.

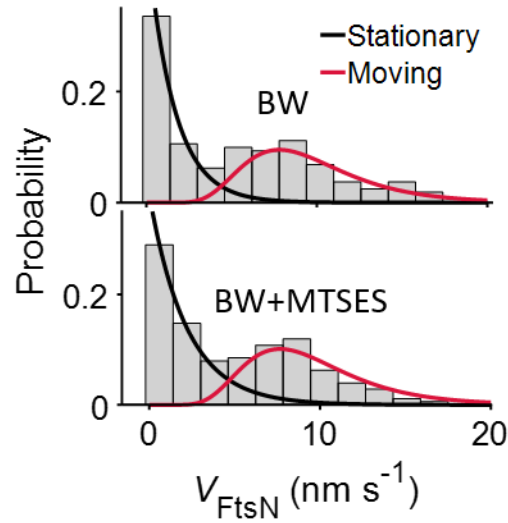

231

232 **Supplementary Fig. 12. MTSES did not alter FtsN-Halo<sup>SW</sup> dynamics in the BW25113**  
 233 **WT strain.**

234 Speed distributions and the corresponding fit curves of the stationary (black) and moving  
 235 (red) populations of single FtsN-Halo<sup>SW</sup> molecules in the BW25113 WT strain in the  
 236 absence (top,  $n = 161$ ) or presence (bottom,  $n = 176$ ) of MTSES. The identical fitted  
 237 parameters shown in Supplementary Table 10 indicate that MTSES did not alter FtsN-  
 238 Halo<sup>SW</sup> dynamics in the BW25113 WT strain. Source data are provided as a Source Data  
 239 file.

240

241

242



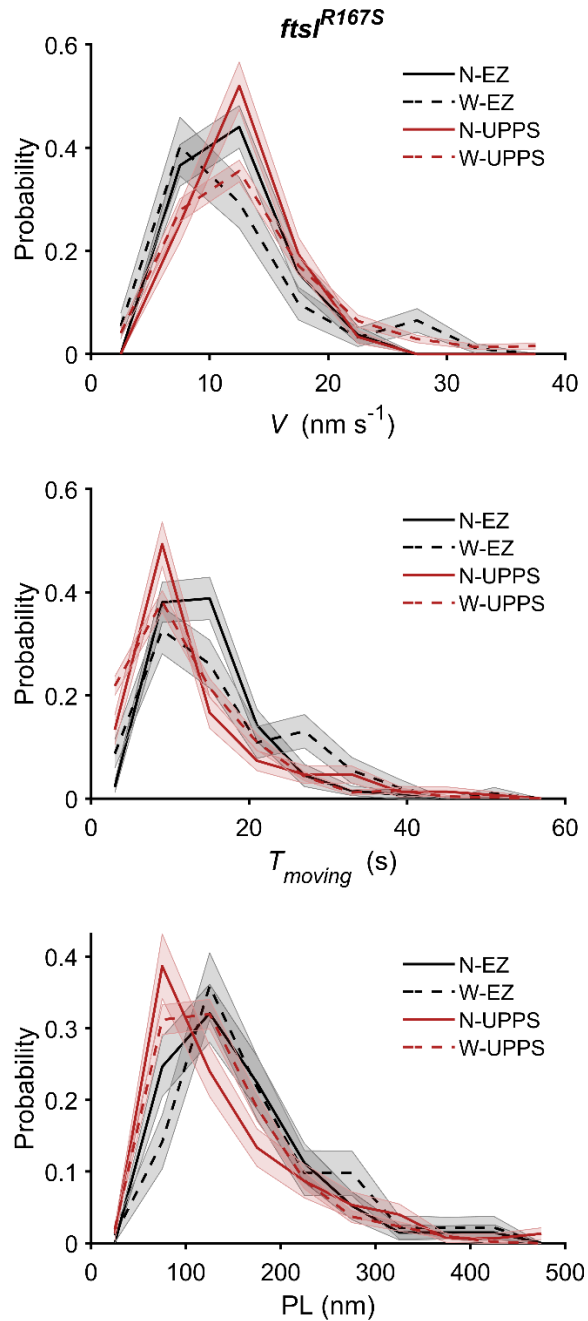

243

244 **Supplementary Fig. 13. Comparison of the distributions of the speed ( $V$ ), moving**  
 245 **dwell time ( $T_{\text{moving}}$ ), and processive running length ( $PL$ ) of FtsN and FtsW in**  
 246 ***ftsI<sup>R167S</sup>* strain grown under the rich EZRDM growth condition and Upps**  
 247 **overexpression condition.**

248 The difference between the distributions of FtsN and FtsW (data from a previous work<sup>5</sup>)  
 249 under the same condition was determined to be insignificant by the two-sample  
 250 Kolmogorov-Smirnov (K-S) test. The calculated  $p$ -values were shown in Supplementary  
 251 Table 11. The sample size of FtsN is listed in Supplementary Table 10. Both FtsN's and  
 252 FtsW's histograms were bootstrapped 100 times to provide the shaded standard error  
 253 bars (mean  $\pm$  s.e.m.). Source data are provided as a Source Data file.

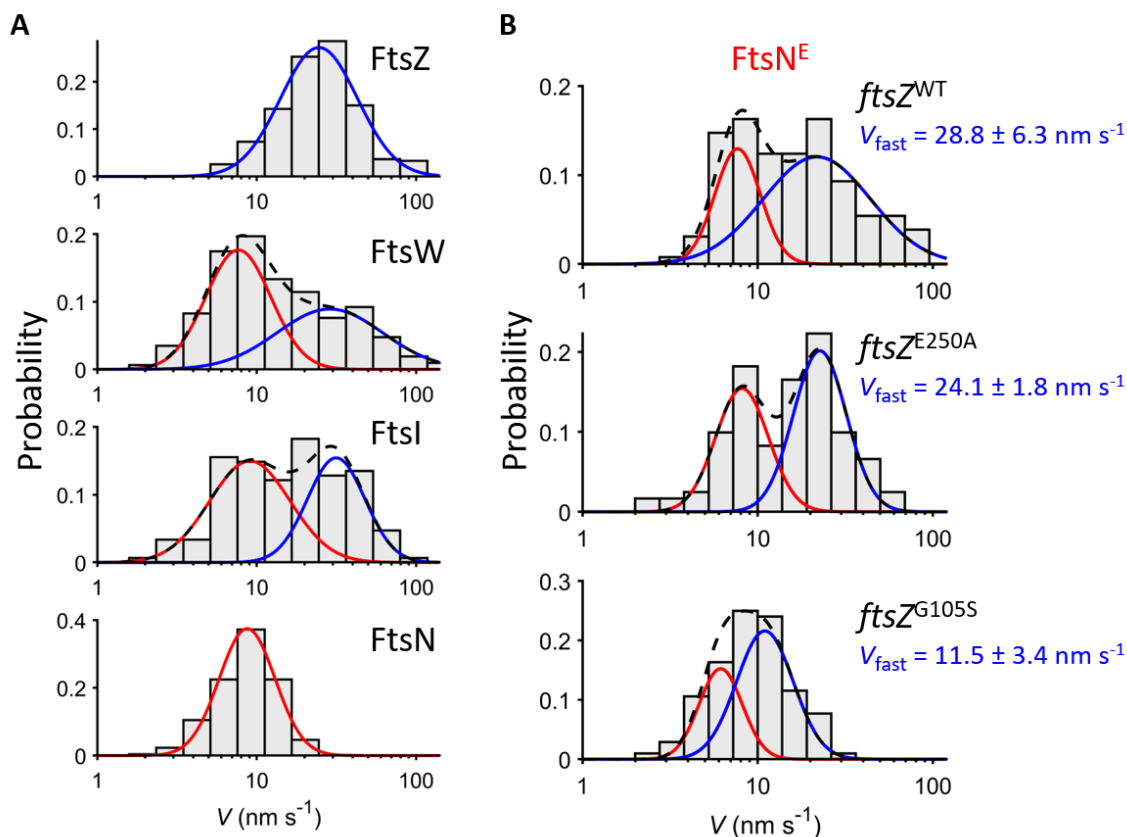

255

256

257 **Supplementary Fig. 14. Comparison of the speed distributions of FtsZ, FtsW, FtsI,**  
 258 **FtsN, and FtsN<sup>E</sup> in different FtsZ GTPase mutant backgrounds under the same**  
 259 **growth condition.**

260 (A) Histograms of the speeds of FtsZ treadmilling<sup>6</sup>, FtsW<sup>5</sup>, FtsI<sup>14</sup>, and FtsN in the log-  
 261 normal scale were overlaid with one- or two-population fitting curves (slow-moving  
 262 population in red, fast-moving population in blue and overall fit curve in black dashed lines).  
 263 (B) Histograms of the speeds of FtsN<sup>E</sup> in different FtsZ GTPase mutant backgrounds in  
 264 the log-normal scale were overlaid with two-population fitting curves (slow-moving  
 265 population in red, fast-moving population in blue and overall fit curve in black dashed lines).  
 266 Strains used are JL339 (*ftsZ*<sup>WT</sup>), JL421 (*ftsZ*<sup>E250A</sup>) and JL422 (*ftsZ*<sup>G105S</sup>), which contain  
 267 *ftsB*<sup>E56A</sup> and  $\Delta$ *ftsN::kan* in addition to the indicated *ftsZ* allele. All the speed histograms,  
 268 contain only the moving population but not the stationary population, were plotted in the  
 269 log-normal scale to better compare with each other. The fitted fast speed was labelled as  
 270 mean  $\pm$  s.e.m., where errors are from 200 bootstrap samples pooled from three  
 271 independent experiments. Source data are provided as a Source Data file.

272

273

274

275

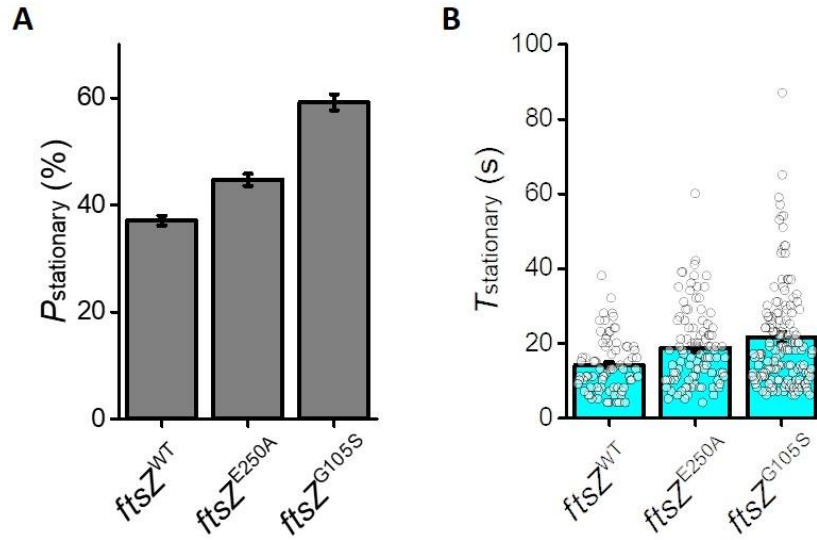

276  
 277  
 278  
 279  
 280  
 281  
 282  
 283  
 284  
 285  
 286  
 287  
 288  
 289  
 290  
 291  
 292  
 293  
 294  
 295  
 296  
 297  
 298  
 299  
 300  
 301  
 302  
 303  
 304  
 305

**Supplementary Fig. 15. Percentage and mean dwell time of stationary FtsN<sup>E</sup> molecules increased with reduced FtsZ GTPase activity.**

(A) Percentage ( $P_{\text{stationary}}$ ) of stationary FtsN<sup>E</sup> molecules increased with reduced FtsZ GTPase activity. Data are presented as mean  $\pm$  error, where the error is the standard deviation from 200 bootstrap samples pooled from three independent experiments. (B) Average dwell time ( $T_{\text{stationary}}$ ) of stationary FtsN<sup>E</sup> molecules increased with reduced FtsZ GTPase activity. Data are presented as mean  $\pm$  s.e.m. overlaid with corresponding data points (shown as open circles.  $ftsZ^{WT}$ ,  $n = 75$ ;  $ftsZ^{E250A}$ ,  $n = 97$ ;  $ftsZ^{G105S}$ ,  $n = 151$ ). Source data are provided as a Source Data file.

**Supplementary Table 1. Strains used in this study.**

| Strains                                      | Relevant genetic markers or features                                                                                                                                                                                                                                                                                                                    | Source, reference or construction                                                                                                         |
|----------------------------------------------|---------------------------------------------------------------------------------------------------------------------------------------------------------------------------------------------------------------------------------------------------------------------------------------------------------------------------------------------------------|-------------------------------------------------------------------------------------------------------------------------------------------|
| Strains without <i>ftsN</i> fusions          |                                                                                                                                                                                                                                                                                                                                                         |                                                                                                                                           |
| Stellar                                      | <i>mcrA</i> $\Delta$ ( <i>mrr-hsdRMS-mcrBC</i> )<br>$\phi$ 80( <i>lacZ</i> ) $\Delta$ M15 $\Delta$ ( <i>lacZYA-argF</i> )U169<br><i>endA1 recA1 supE44 thi-1 gyrA96</i><br><i>relA1</i>                                                                                                                                                                 | Takara, cloning host                                                                                                                      |
| MG1655                                       | <i>ilvG rfb50 rph1</i>                                                                                                                                                                                                                                                                                                                                  | 7                                                                                                                                         |
| BW25113                                      | <i>rrnB3</i> $\Delta$ <i>lacZ4787 hsdR514</i><br>$\Delta$ ( <i>araBAD</i> )567<br>$\Delta$ ( <i>rhaBAD</i> )568 <i>rph-1</i>                                                                                                                                                                                                                            | 8                                                                                                                                         |
| OmniMAX-2<br>T1R                             | F' [ <i>proAB</i> <sup>+</sup> <i>lac</i> <sup>f</sup> <i>lacZ</i> $\Delta$ M15 Tn10(Tet <sup>r</sup> )<br>$\Delta$ ( <i>ccdAB</i> )] <i>mcrA</i> $\Delta$ ( <i>mrr-hsdRMS-</i><br><i>mcrBC</i> ) $\phi$ 80( <i>lacZ</i> ) $\Delta$ M15 $\Delta$ ( <i>lacZYA-</i><br><i>argF</i> )U169 <i>endA1 recA1 supE44 thi-1</i><br><i>gyrA96 relA1 tonA panD</i> | Invitrogen, cloning host                                                                                                                  |
| XY088                                        | BW25113 <i>ftsZ</i> <sup>E238A</sup>                                                                                                                                                                                                                                                                                                                    | 6                                                                                                                                         |
| XY072                                        | BW25113 <i>ftsZ</i> <sup>E250A</sup>                                                                                                                                                                                                                                                                                                                    | 6                                                                                                                                         |
| XY089                                        | BW25113 <i>ftsZ</i> <sup>D269A</sup>                                                                                                                                                                                                                                                                                                                    | 6                                                                                                                                         |
| XY058                                        | BW25113 <i>ftsZ</i> <sup>G105S</sup>                                                                                                                                                                                                                                                                                                                    | 6 [same amino acid<br>substitution as <i>ftsZ84</i> (Ts)]                                                                                 |
| DRC14                                        | MC4100 <i>ftsZ84</i> (Ts) <i>leu::Tn10</i>                                                                                                                                                                                                                                                                                                              | D. RayChaudhuri (FtsZ<br>amino acid substitution is<br>G105S)                                                                             |
| EC251                                        | WT, Weiss lab isolate of MG1655                                                                                                                                                                                                                                                                                                                         | 9                                                                                                                                         |
| EC1532                                       | BL21(DE3) / pDSW730                                                                                                                                                                                                                                                                                                                                     | Transformation, select Amp <sup>r</sup>                                                                                                   |
| EC1908                                       | EC251 P <sub>BAD</sub> :: <i>ftsN</i> (Kan <sup>r</sup> )                                                                                                                                                                                                                                                                                               | 10                                                                                                                                        |
| EC5784                                       | BW25113 <i>ftsZ</i> <sup>E250A</sup> <i>leu::Tn10</i>                                                                                                                                                                                                                                                                                                   | P1 DRC14 x XY072, select<br>Tet <sup>r</sup> at 30°, screen for ability<br>to grow on LB0N at 42°C.                                       |
| EC5820                                       | <i>ftsZ</i> <sup>G105S</sup> <i>leu::Tn10 ftsB</i> <sup>E56A</sup> $\Delta$ <i>ftsN::kan</i>                                                                                                                                                                                                                                                            | P1 DRC14 x BL173, select<br>Tet <sup>r</sup> at 30°C, screen Ts on<br>LB0N at 42°C. Confirm <i>ftsZ</i><br>mutation by DNA<br>sequencing. |
| EC5822                                       | <i>ftsZ</i> <sup>E250A</sup> <i>leu::Tn10 ftsB</i> <sup>E56A</sup> $\Delta$ <i>ftsN::kan</i>                                                                                                                                                                                                                                                            | P1 EC5784 x BL173, select<br>Tet <sup>r</sup> . Confirm <i>ftsZ</i> mutation<br>by DNA sequencing.                                        |
| JOE565                                       | MC4100 <i>ftsN::kan araD</i> <sup>+</sup>                                                                                                                                                                                                                                                                                                               | 11                                                                                                                                        |
| BL173                                        | TB28 <i>ftsB</i> <sup>E56A</sup> $\Delta$ <i>ftsN::kan</i>                                                                                                                                                                                                                                                                                              | 12                                                                                                                                        |
| PM6                                          | TB28 <i>ftsI</i> <sup>R167S</sup>                                                                                                                                                                                                                                                                                                                       | 5                                                                                                                                         |
| JXY559                                       | BW25113 <i>ftsW</i> <sup>A302C</sup>                                                                                                                                                                                                                                                                                                                    | 5                                                                                                                                         |
| JM136                                        | TB28 <i>ftsI</i> (18-19)-Halo <sup>SW</sup>                                                                                                                                                                                                                                                                                                             | 13                                                                                                                                        |
| JL273                                        | EC1908 / pJL098 [P <sub>T5-lac</sub> :: <i>ftsN</i> Amp <sup>r</sup> ]                                                                                                                                                                                                                                                                                  | This study                                                                                                                                |
| Strains with chromosomal <i>ftsN</i> fusions |                                                                                                                                                                                                                                                                                                                                                         |                                                                                                                                           |

|        |                                                                                                                                                     |                                                             |
|--------|-----------------------------------------------------------------------------------------------------------------------------------------------------|-------------------------------------------------------------|
| EC4240 | $P_{BAD}::ftsN$ (Kan <sup>r</sup> ) $attP_{HK022}::pDSW1839$<br>[ $P_{204}::gfp-ftsN$ Spc <sup>r</sup> ]                                            | Integrate pDSW1839 into EC1908 using pAH69                  |
| EC4443 | $P_{BAD}::ftsN$ (Kan <sup>r</sup> ) $attP_{\phi80}::pDSW1890$<br>[ $P_{204\_7A}::mEos3.2-ftsN$ Spc <sup>r</sup> ]                                   | Integrate pDSW1890 into EC1908 using pAH123                 |
| EC4564 | $P_{BAD}::ftsN$ (Kan <sup>r</sup> ) $attP_{\phi80}::pDSW1926$<br>[ $P_{204\_7A}::mNG-ftsN$ Spc <sup>r</sup> ]                                       | Integrate pDSW1926 into EC1908 using pAH123                 |
| EC5230 | $attP_{\phi80}::pDSW2083$ [ $P_{204\_7A}::ftsN-$<br>$Halo^{E60SW}$ Spc <sup>r</sup> ]                                                               | Integrate pDSW2083 into EC251 using pAH123                  |
| EC5234 | $P_{BAD}::ftsN$ (Kan <sup>r</sup> ) $attP_{\phi80}::pDSW2083$<br>[ $P_{204\_7A}::ftsN-Halo^{E60SW}$ Spc <sup>r</sup> ]                              | Integrate pDSW2083 into EC1908 using pAH123                 |
| EC5263 | $P_{BAD}::ftsN$ (Kan <sup>r</sup> ) $attP_{\phi80}::pDSW2099$<br>[ $P_{204\_7A}::dsbA^{SS}-Halo-ftsN^{\Delta Cyto-TM}$ Spc <sup>r</sup> ]           | Integrate pDSW2099 into EC1908 using pAH123                 |
| EC5271 | $P_{BAD}::ftsN$ (Kan <sup>r</sup> ) $attP_{\phi80}::pDSW2091$<br>[ $P_{204\_7A}::ftsN^{D5N}-Halo^{SW}$ Spc <sup>r</sup> ]                           | Integrate pDSW2091 into EC1908 using pAH123                 |
| EC5317 | $P_{BAD}::ftsN$ (Kan <sup>r</sup> ) $attP_{\phi80}::pDSW2105$<br>[ $P_{204\_7A}::ftsN^{Cyto-TM}-Halo^{SW}$ Spc <sup>r</sup> ]                       | Integrate pDSW2105 into EC1908 using pAH123                 |
| EC5321 | $P_{BAD}::ftsN$ (Kan <sup>r</sup> ) $attP_{\phi80}::pDSW2109$<br>[ $P_{204\_7A}::ftsN^{Cyto-TM-D5N}-Halo^{SW}$ Spc <sup>r</sup> ]                   | Integrate pDSW2109 into EC1908 using pAH123                 |
| EC5333 | BW25113 $attP_{\phi80}::pDSW2083$<br>[ $P_{204\_7A}::ftsN-Halo^{E60SW}$ Spc <sup>r</sup> ]                                                          | Integrate pDSW2083 into BW25113 using pAH123                |
| EC5335 | BW25113 $ftsZ^{E238A}$ $attP_{\phi80}::pDSW2083$<br>[ $P_{204\_7A}::ftsN-Halo^{E60SW}$ Spc <sup>r</sup> ]                                           | Integrate pDSW2083 into BW25113 $ftsZ^{E238A}$ using pAH123 |
| EC5337 | BW25113 $ftsZ^{E250A}$ $attP_{\phi80}::pDSW2083$<br>[ $P_{204\_7A}::ftsN-Halo^{E60SW}$ Spc <sup>r</sup> ]                                           | Integrate pDSW2083 into BW25113 $ftsZ^{E250A}$ using pAH123 |
| EC5339 | BW25113 $ftsZ^{D269A}$ $attP_{\phi80}::pDSW2083$<br>[ $P_{204\_7A}::ftsN-Halo^{E60SW}$ Spc <sup>r</sup> ]                                           | Integrate pDSW2083 into BW25113 $ftsZ^{D269A}$ using pAH123 |
| EC5341 | BW25113 $ftsZ^{G105S}$ $attP_{\phi80}::pDSW2083$<br>[ $P_{204\_7A}::ftsN-Halo^{E60SW}$ Spc <sup>r</sup> ]                                           | Integrate pDSW2083 into BW25113 $ftsZ^{G105S}$ using pAH123 |
| EC5351 | BW25113 $P_{BAD}::ftsN$ (Kan <sup>r</sup> )<br>$attP_{\phi80}::pDSW2083$ [ $P_{204\_7A}::ftsN-$<br>$Halo^{E60SW}$ Spc <sup>r</sup> ]                | P1 EC1908 x EC5333, select Kan <sup>r</sup>                 |
| EC5353 | BW25113 $ftsZ^{E238A}$ $P_{BAD}::ftsN$ (Kan <sup>r</sup> )<br>$attP_{\phi80}::pDSW2083$ [ $P_{204\_7A}::ftsN-$<br>$Halo^{E60SW}$ Spc <sup>r</sup> ] | P1 EC1908 x EC5335, select Kan <sup>r</sup>                 |
| EC5355 | BW25113 $ftsZ^{E250A}$ $P_{BAD}::ftsN$ (Kan <sup>r</sup> )<br>$attP_{\phi80}::pDSW2083$ [ $P_{204\_7A}::ftsN-$<br>$Halo^{E60SW}$ Spc <sup>r</sup> ] | P1 EC1908 x EC5337, select Kan <sup>r</sup>                 |
| EC5357 | BW25113 $ftsZ^{D269A}$ $P_{BAD}::ftsN$ (Kan <sup>r</sup> )<br>$attP_{\phi80}::pDSW2083$ [ $P_{204\_7A}::ftsN-$<br>$Halo^{E60SW}$ Spc <sup>r</sup> ] | P1 EC1908 x EC5339, select Kan <sup>r</sup>                 |
| EC5359 | BW25113 $ftsZ^{G105S}$ $P_{BAD}::ftsN$ (Kan <sup>r</sup> )<br>$attP_{\phi80}::pDSW2083$ [ $P_{204\_7A}::ftsN-$<br>$Halo^{E60SW}$ Spc <sup>r</sup> ] | P1 EC1908 x EC5341, select Kan <sup>r</sup>                 |
| EC5377 | TB28 $ftsR^{167S}$ $attP_{\phi80}::pDSW2083$<br>[ $P_{204\_7A}::ftsN-Halo^{E60SW}$ Spc <sup>r</sup> ]                                               | P1 EC5230 x PM6, select Spc <sup>r</sup>                    |

|                                              |                                                                                                                                                                                                             |                                                                            |
|----------------------------------------------|-------------------------------------------------------------------------------------------------------------------------------------------------------------------------------------------------------------|----------------------------------------------------------------------------|
| EC5383                                       | BW25113 <i>ftsW</i> <sup>A302C</sup> <i>attP</i> <sub>φ80</sub> ::pDSW2083 [P <sub>204_7A</sub> :: <i>ftsN-Halo</i> <sup>E60SW</sup> Spc <sup>r</sup> ]                                                     | P1 EC5230 x BW25113 <i>ftsW</i> <sup>A302C</sup> , select Spc <sup>r</sup> |
| EC5387                                       | <i>ftsR</i> <sup>R167S</sup> P <sub>BAD</sub> :: <i>ftsN</i> (Kan <sup>r</sup> ) <i>attP</i> <sub>φ80</sub> ::pDSW2083 [P <sub>204_7A</sub> :: <i>ftsN-Halo</i> <sup>E60SW</sup> Spc <sup>r</sup> ]         | P1 EC1908 x EC5377, select Spc <sup>r</sup>                                |
| EC5391                                       | BW25113 <i>ftsW</i> <sup>A302C</sup> P <sub>BAD</sub> :: <i>ftsN</i> (Kan <sup>r</sup> ) <i>attP</i> <sub>φ80</sub> ::pDSW2083 [P <sub>204_7A</sub> :: <i>ftsN-Halo</i> <sup>E60SW</sup> Spc <sup>r</sup> ] | P1 EC1908 x EC5383, select Kan <sup>r</sup>                                |
| EC5435                                       | BW25113 <i>ftsZ</i> <sup>E238A</sup> <i>attP</i> <sub>φ8</sub> ::pDSW2105 [P <sub>204_7A</sub> :: <i>ftsN</i> <sup>Cyto-TM</sup> - <i>Halo</i> <sup>SW</sup> Spc <sup>r</sup> ]                             | Integrate pDSW2105 into EC5277 using pAH123                                |
| EC5437                                       | BW25113 <i>ftsZ</i> <sup>E250A</sup> <i>attP</i> <sub>φ8</sub> ::pDSW2105 [P <sub>204_7A</sub> :: <i>ftsN</i> <sup>Cyto-TM</sup> - <i>Halo</i> <sup>E60SW</sup> Spc <sup>r</sup> ]                          | Integrate pDSW2105 into BW25113 <i>ftsZ</i> <sup>E250A</sup> using pAH123  |
| EC5439                                       | BW25113 <i>ftsZ</i> <sup>D269A</sup> <i>attP</i> <sub>φ8</sub> ::pDSW2105 [P <sub>204_7A</sub> :: <i>ftsN</i> <sup>Cyto-TM</sup> - <i>Halo</i> <sup>E60SW</sup> Spc <sup>r</sup> ]                          | Integrate pDSW2105 into BW25113 <i>ftsZ</i> <sup>D269A</sup> using pAH123  |
| EC5441                                       | BW25113 <i>ftsZ</i> <sup>G105S</sup> <i>attP</i> <sub>φ8</sub> ::pDSW2105 [P <sub>204_7A</sub> :: <i>ftsN</i> <sup>Cyto-TM</sup> - <i>Halo</i> <sup>E60SW</sup> Spc <sup>r</sup> ]                          | Integrate pDSW2105 into BW25113 <i>ftsZ</i> <sup>G105S</sup> using pAH123  |
| Strains with <i>ftsN</i> fusions on plasmids |                                                                                                                                                                                                             |                                                                            |
| EC5606                                       | EC251 P <sub>BAD</sub> :: <i>ftsN</i> (Kan <sup>r</sup> ) / pJL113 [P <sub>T5-lac</sub> :: <i>ftsN-Halo</i> <sup>SW</sup> Amp <sup>r</sup> ]                                                                | Transform into EC1908, select Amp <sup>r</sup>                             |
| JL035                                        | JOE565 / pJL019 [P <sub>T5-lac</sub> :: <i>mNG-ftsN</i> Amp <sup>r</sup> ]                                                                                                                                  | Transform, select Amp <sup>r</sup>                                         |
| JL080                                        | JOE565 / pJL028 [P <sub>T5-lac</sub> :: <i>ftsN-mNG</i> Amp <sup>r</sup> ]                                                                                                                                  | Transform, select Amp <sup>r</sup>                                         |
| JL247                                        | EC1908 / pJL107 [P <sub>T5-lac</sub> :: <i>mNG-ftsN</i> (P12-A13)- <i>mNG</i> <sup>SW</sup> Amp <sup>r</sup> ]                                                                                              | Transform, select Amp <sup>r</sup>                                         |
| JL231                                        | EC1908 / pJL103 [P <sub>T5-lac</sub> :: <i>mNG-ftsN</i> (N28-L29)- <i>NeG</i> <sup>SW</sup> Amp <sup>r</sup> ]                                                                                              | Transform, select Amp <sup>r</sup>                                         |
| JL248                                        | EC1908 / pJL108 [P <sub>T5-lac</sub> :: <i>mNG-ftsN</i> (E60-E61)- <i>mNG</i> <sup>SW</sup> Amp <sup>r</sup> ]                                                                                              | Transform, select Amp <sup>r</sup>                                         |
| JL249                                        | EC1908 / pJL109 [P <sub>T5-lac</sub> :: <i>mNG-ftsN</i> (K69-V70)- <i>mNG</i> <sup>SW</sup> Amp <sup>r</sup> ]                                                                                              | Transform, select Amp <sup>r</sup>                                         |
| JL250                                        | EC1908 / pJL110 [P <sub>T5-lac</sub> :: <i>mNG-ftsN</i> (Q113-L114)- <i>mNG</i> <sup>SW</sup> Amp <sup>r</sup> ]                                                                                            | Transform, select Amp <sup>r</sup>                                         |
| JL251                                        | EC1908 / pJL111 [P <sub>T5-lac</sub> :: <i>mNG-ftsN</i> (Q124-M125)- <i>mNG</i> <sup>SW</sup> Amp <sup>r</sup> ]                                                                                            | Transform, select Amp <sup>r</sup>                                         |
| JL232                                        | EC1908 / pJL100 [P <sub>T5-lac</sub> :: <i>mNG-ftsN</i> (Q151-T152)- <i>mNG</i> <sup>SW</sup> Amp <sup>r</sup> ]                                                                                            | Transform, select Amp <sup>r</sup>                                         |
| JL233                                        | EC1908 / pJL101 [P <sub>T5-lac</sub> :: <i>mNG-ftsN</i> (Q182-T183)- <i>mNG</i> <sup>SW</sup> Amp <sup>r</sup> ]                                                                                            | Transform, select Amp <sup>r</sup>                                         |
| JL234                                        | EC1908 / pJL102 [P <sub>T5-lac</sub> :: <i>mNG-ftsN</i> (Q212-T213)- <i>mNG</i> <sup>SW</sup> Amp <sup>r</sup> ]                                                                                            | Transform, select Amp <sup>r</sup>                                         |
| JL364                                        | EC5377 / pCH650 [pACYC, <i>cat araC</i> P <sub>BAD</sub> :: <i>uppS</i> ]                                                                                                                                   | Transform, select Cam <sup>r</sup>                                         |
| JL397                                        | BL173 / pJL132 [P <sub>T5-lac</sub> :: <i>ftsN-Halo</i> <sup>SW</sup> Cam <sup>r</sup> ]                                                                                                                    | Transform, select Cam <sup>r</sup>                                         |

|       |                                                                                                                           |                                    |
|-------|---------------------------------------------------------------------------------------------------------------------------|------------------------------------|
| JL398 | BL173 / pJL133 [P <sub>T5-lac</sub> :: <i>ftsN</i> <sup>WYAA</sup> - <i>Halo</i> <sup>SW</sup> Cam <sup>r</sup> ]         | Transform, select Cam <sup>r</sup> |
| JL399 | BL173 / pJL136 [P <sub>T5-lac</sub> :: <i>dsbA</i> <sup>SS</sup> - <i>Halo-ftsN</i> <sup>61-105</sup> Cam <sup>r</sup> ]  | Transform, select Cam <sup>r</sup> |
| JL421 | EC5820 / pJL136 [P <sub>T5-lac</sub> :: <i>dsbA</i> <sup>SS</sup> - <i>Halo-ftsN</i> <sup>61-105</sup> Cam <sup>r</sup> ] | Transform, select Cam <sup>r</sup> |
| JL422 | EC5822 / pJL136 [P <sub>T5-lac</sub> :: <i>dsbA</i> <sup>SS</sup> - <i>Halo-ftsN</i> <sup>61-105</sup> Cam <sup>r</sup> ] | Transform, select Cam <sup>r</sup> |

307  
308

**Supplementary Table 2. Plasmids used in this study.**

| Plasmid  | Relevant features/description                                                                                                                                                   | Source or reference |
|----------|---------------------------------------------------------------------------------------------------------------------------------------------------------------------------------|---------------------|
| pAH69    | $\lambda$ cl857, <i>rep101</i> <sup>ts</sup> ori, P <sub>r</sub> - <i>int</i> <sub>HK022</sub> , Amp <sup>r</sup>                                                               | 14                  |
| pAH123   | $\lambda$ cl857, <i>rep101</i> <sup>ts</sup> ori, P <sub>r</sub> - <i>int</i> <sub>Φ80</sub> , Amp <sup>r</sup>                                                                 | 14                  |
| pDSW254  | P <sub>204</sub> :: <i>gfp-ftsI lacI</i> <sup>Q</sup> Kan <sup>r</sup> pBR ori                                                                                                  | 15                  |
| pDSW238  | P <sub>204</sub> :: <i>gfp-ftsN</i> Amp <sup>r</sup> pBR ori                                                                                                                    | 16                  |
| pDSW499  | Promoterless <i>gfp-MCS oriR<sub>y</sub> attP</i> <sub>HK022</sub> Spc <sup>r</sup>                                                                                             | 17                  |
| pDSW534  | P <sub>204</sub> :: <i>gfp-MCS lacI</i> <sup>Q</sup> <i>oriR<sub>y</sub> attP</i> <sub>HK022</sub> Spc <sup>r</sup>                                                             | This study          |
| pDSW984  | P <sub>204</sub> :: <i>gfp-dedD lacI</i> <sup>Q</sup> <i>oriR<sub>y</sub> attP</i> <sub>Φ80</sub> Spc <sup>r</sup>                                                              | 18                  |
| pDSW730  | P <sub>T5/lac</sub> :: <i>His6-ftsN</i> <sup>peri</sup> <i>lacI</i> <sup>Q</sup> Amp <sup>r</sup> pBR ori                                                                       | This study          |
| pDSW1198 | P <sub>204</sub> :: <i>gfp lacI</i> <sup>Q</sup> <i>oriR<sub>y</sub> attP</i> <sub>Φ80</sub> Spc <sup>r</sup>                                                                   | 19                  |
| pDSW1839 | P <sub>204</sub> :: <i>gfp-ftsN lacI</i> <sup>Q</sup> <i>oriR<sub>y</sub> attP</i> <sub>HK022</sub> Spc <sup>r</sup>                                                            | This study          |
| pDSW1866 | P <sub>204_7A</sub> :: <i>gfp-dedD lacI</i> <sup>Q</sup> <i>oriR<sub>y</sub> attP</i> <sub>Φ80</sub> Spc <sup>r</sup>                                                           | This study          |
| pDSW1876 | P <sub>204_7A</sub> :: <i>gfp-BamHI lacI</i> <sup>Q*</sup> <i>oriR<sub>y</sub> attP</i> <sub>Φ80</sub> Spc <sup>r</sup>                                                         | This study          |
| pDSW1884 | P <sub>204_7A</sub> :: <i>mEos3.2-MCS lacI</i> <sup>Q</sup> <i>oriR<sub>y</sub> attP</i> <sub>Φ80</sub> Spc <sup>r</sup>                                                        | This study          |
| pDSW1890 | P <sub>204_7A</sub> :: <i>mEos3.2-ftsN lacI</i> <sup>Q</sup> <i>oriR<sub>y</sub> attP</i> <sub>Φ80</sub> Spc <sup>r</sup>                                                       | This study          |
| pDSW1920 | P <sub>204_7A</sub> :: <i>Halo-ftsN lacI</i> <sup>Q</sup> <i>oriR<sub>y</sub> attP</i> <sub>Φ80</sub> Spc <sup>r</sup>                                                          | This study          |
| pDSW1926 | P <sub>204_7A</sub> :: <i>mNG-ftsN lacI</i> <sup>Q</sup> <i>oriR<sub>y</sub> attP</i> <sub>Φ80</sub> Spc <sup>r</sup>                                                           | This study          |
| pDSW2031 | P <sub>204_7A</sub> :: <i>ftsN-mNG</i> <sup>E60SW</sup> <i>lacI</i> <sup>Q</sup> <i>oriR<sub>y</sub> attP</i> <sub>Φ80</sub> Spc <sup>r</sup>                                   | This study          |
| pDSW2035 | P <sub>204_7A</sub> :: <i>ftsN-Halo</i> <sup>Q141SW</sup> <i>lacI</i> <sup>Q*</sup> <i>oriR<sub>y</sub> attP</i> <sub>Φ80</sub> Spc <sup>r</sup>                                | This study          |
| pDSW2083 | P <sub>204_7A</sub> :: <i>ftsN-Halo</i> <sup>E60SW</sup> <i>lacI</i> <sup>Q*</sup> <i>oriR<sub>y</sub> attP</i> <sub>Φ80</sub> Spc <sup>r</sup>                                 | This study          |
| pDSW2091 | P <sub>204_7A</sub> :: <i>ftsN</i> <sup>D5N</sup> - <i>Halo</i> <sup>E60SW</sup> <i>lacI</i> <sup>Q*</sup> <i>oriR<sub>y</sub> attP</i> <sub>Φ80</sub> Spc <sup>r</sup>         | This study          |
| pDSW2099 | P <sub>204_7A</sub> :: <i>dsbA</i> <sup>SS</sup> - <i>Halo-ftsN</i> <sup>Δcyto-TM</sup> <i>lacI</i> <sup>Q*</sup> <i>oriR<sub>y</sub> attP</i> <sub>Φ80</sub> Spc <sup>r</sup>  | This study          |
| pDSW2105 | P <sub>204_7A</sub> :: <i>ftsN</i> <sup>Cyto-TM</sup> - <i>Halo</i> <sup>E60SW</sup> <i>lacI</i> <sup>Q*</sup> <i>oriR<sub>y</sub> attP</i> <sub>Φ80</sub> Spc <sup>r</sup>     | This study          |
| pDSW2109 | P <sub>204_7A</sub> :: <i>ftsN</i> <sup>Cyto-TM-D5N</sup> - <i>Halo</i> <sup>E60SW</sup> <i>lacI</i> <sup>Q*</sup> <i>oriR<sub>y</sub> attP</i> <sub>Φ80</sub> Spc <sup>r</sup> | This study          |
| pXY027   | ColE1, P <sub>T5-lac</sub> :: <i>ftsZ-GFP</i> , Cam <sup>r</sup>                                                                                                                | 20                  |
| pXY677   | ColE1, P <sub>T5-lac</sub> :: <i>mNG-zapA</i> , Cam <sup>r</sup>                                                                                                                | 5                   |
| pJL015   | ColE1, P <sub>T5-lac</sub> :: <i>mEos3.2-ftsN</i> , Amp <sup>r</sup>                                                                                                            | 4                   |
| pJL028   | ColE1, P <sub>T5-lac</sub> :: <i>ftsN-mNG</i> , Amp <sup>r</sup>                                                                                                                | This study          |
| pJL033   | ColE1, P <sub>T5-lac</sub> :: <i>Halo-ftsN</i> , Amp <sup>r</sup>                                                                                                               | This study          |
| pJL069   | P <sub>204_7A</sub> :: <i>Halo-ftsN</i> <sup>243-319</sup> <i>lacI</i> <sup>Q*</sup> <i>oriR<sub>y</sub> attP</i> <sub>Φ80</sub> Spc <sup>r</sup>                               | This study          |
| pJL074   | P <sub>204_7A</sub> :: <i>dsbA</i> <sup>SS</sup> - <i>Halo-ftsN</i> <sup>243-319</sup> <i>lacI</i> <sup>Q*</sup> <i>oriR<sub>y</sub> attP</i> <sub>Φ80</sub> Spc <sup>r</sup>   | This study          |
| pJL098   | ColE1, P <sub>T5-lac</sub> :: <i>ftsN</i> , Amp <sup>r</sup>                                                                                                                    | This study          |
| pJL019   | ColE1, P <sub>T5-lac</sub> :: <i>mNG-ftsN</i> , Amp <sup>r</sup>                                                                                                                | This study          |
| pJL107   | ColE1, P <sub>T5-lac</sub> :: <i>ftsN(P12-A13)-mNG</i> <sup>SW</sup> , Amp <sup>r</sup>                                                                                         | This study          |
| pJL103   | ColE1, P <sub>T5-lac</sub> :: <i>ftsN(N28-L29)-mNG</i> <sup>SW</sup> , Amp <sup>r</sup>                                                                                         | This study          |
| pJL108   | ColE1, P <sub>T5-lac</sub> :: <i>ftsN(E60-E61)-mNG</i> <sup>SW</sup> , Amp <sup>r</sup>                                                                                         | This study          |
| pJL109   | ColE1, P <sub>T5-lac</sub> :: <i>ftsN(K69-V70)-mNG</i> <sup>SW</sup> , Amp <sup>r</sup>                                                                                         | This study          |
| pJL110   | ColE1, P <sub>T5-lac</sub> :: <i>ftsN(Q113-L114)-mNG</i> <sup>SW</sup> , Amp <sup>r</sup>                                                                                       | This study          |
| pJL111   | ColE1, P <sub>T5-lac</sub> :: <i>ftsN(Q124-M125)-mNG</i> <sup>SW</sup> , Amp <sup>r</sup>                                                                                       | This study          |
| pJL100   | ColE1, P <sub>T5-lac</sub> :: <i>ftsN(Q151-T152)-mNG</i> <sup>SW</sup> , Amp <sup>r</sup>                                                                                       | This study          |
| pJL101   | ColE1, P <sub>T5-lac</sub> :: <i>ftsN(Q182-T183)-mNG</i> <sup>SW</sup> , Amp <sup>r</sup>                                                                                       | This study          |



|        |                                                                                                      |              |
|--------|------------------------------------------------------------------------------------------------------|--------------|
| pJL102 | ColE1, P <sub>T5-lac</sub> :: <i>ftsN(Q212-T213)-mNG<sup>SW</sup></i> , Amp <sup>r</sup>             | This study   |
| pJL112 | ColE1, P <sub>T5-lac</sub> :: <i>ftsN(Q151-T152)-Halo<sup>SW</sup></i> , Amp <sup>r</sup>            | This study   |
| pJL113 | ColE1, P <sub>T5-lac</sub> :: <i>ftsN(E60-E61)-Halo<sup>SW</sup></i> , Amp <sup>r</sup>              | This study   |
| pJL119 | ColE1, P <sub>T5-lac</sub> :: <i>ftsN</i> , Cam <sup>r</sup>                                         | This study   |
| pJL123 | ColE1, P <sub>T5-lac</sub> :: <i>dsbA<sup>ss</sup>-ftsN<sup>243-319</sup></i> , Cam <sup>r</sup>     | This study   |
| pJL132 | ColE1, P <sub>T5-lac</sub> :: <i>ftsN(E60-E61)-Halo<sup>SW</sup></i> , Cam <sup>r</sup>              | This study   |
| pJL133 | ColE1, P <sub>T5-lac</sub> :: <i>ftsN(E60-E61, WYAA)-Halo<sup>SW</sup></i> , Cam <sup>r</sup>        | This study   |
| pJL135 | ColE1, P <sub>T5-lac</sub> :: <i>dsbA<sup>ss</sup>-ftsN<sup>61-105</sup></i> , Cam <sup>r</sup>      | This study   |
| pJL136 | ColE1, P <sub>T5-lac</sub> :: <i>dsbA<sup>ss</sup>-Halo-ftsN<sup>61-105</sup></i> , Cam <sup>r</sup> | This study   |
| pCH650 | pACYC, <i>cat araC</i> P <sub>BAD</sub> :: <i>uppS</i>                                               | <sup>5</sup> |

310

311 pDSW534. A 1706 bp fragment encoding *lac<sup>Q</sup>* and P<sub>204</sub>::*gfp* was obtained by digesting  
312 pDSW254 with NdeI, SphI and XmnI. The fragment was ligated into pDSW499 after  
313 digestion with NdeI and SphI.

314

315 pDSW730. Amplify periplasmic domain of *ftsN* with primers P760 and P761. The 833 bp  
316 fragment was digested with BamHI and HindIII, then ligated into the same sites of pQE-  
317 80L (Qiagen).

318

319 pDSW1839. Amplify *gfp-ftsN* from pDSW238 with primers P2108 and P2109. The 1142  
320 bp product was digested with MfeI and SacI, then ligated into the same sites of pDSW534.

321

322 pDSW1866. The P<sub>204</sub> promoter in pDSW984 was replaced with a weaker P<sub>204\_7A</sub> promoter  
323 using isothermal assembly to insert a 675 bp gBlock into the SfoI and NdeI sites of  
324 pDSW984.

325

326 pDSW1876. The P<sub>204</sub> promoter in pDSW1198 was replaced with a weaker P<sub>204\_7A</sub> promoter  
327 using isothermal assembly to insert a 675 bp gBlock into the SfoI and NdeI sites of  
328 pDSW1198. The *lac<sup>Q</sup>* allele is designated *lac<sup>Q\*</sup>* because it was later found to have a  
329 frame shift mutation, a deletion of T999. The last 28 amino acids of wild-type LacI  
330 (NTQTASPRALADSLMQLARQVSRLESGQ) become KRKPPLPARWPIH. The mutant  
331 Lac repressor is still active but does not repress as well as wild-type, so leaky expression  
332 is about two-fold higher.

333

334 pDSW1884. Amplify mEos3.2 from pJL015 with primers P2163 and P2164. The 757 bp  
335 fragment was digested with AflII and MfeI, then ligated into AflII-EcoRI digested  
336 pDSW1866.

337

338 pDSW1890. Amplify *ftsN* from pJL015 with P2178 and P2179. The 1029 bp product was  
339 digested with EcoRI and BamHI, and ligated into the same sites of pDSW1884.

340

341 pDSW1920. Amplify *Halo* from pJL033 with primers P2228 and P2225. The 927 bp  
342 product was digested with AflII and EcoRI, then ligated into the same sites of pDS1890.

343

344

345 pDSW1926. Amplify mNeonGreen from pJL019 with primers P2222 and P2223. The 744  
346 bp product was digested with AflIII and EcoRI, then ligated into the same sites of pDS1890.  
347

348 pDSW2031. Amplify the *ftsN*(E60-mNG) sandwich fusion from pJL108 with P2392 and  
349 P2393. The 1730 bp product was digested with AflIII and BamHI, then ligated into the same  
350 sites of pDSW1876.  
351

352 pDSW2035. Amplify the *ftsN*(Q151-Halo) sandwich fusion from pJL112 with P2392 and  
353 P2394. The 1916 bp product was digested with AflIII and BamHI, then ligated into the same  
354 sites of pDSW1876.  
355

356 pDSW2083. Constructed from a four-fragment Gibson Assembly. The vector backbone  
357 was obtained by digestion of pDSW2035 with AflIII and KpnI. The inserts were a 231 bp  
358 fragment amplified from pDSW2031 with primers P2439 and P2445, an 891 bp fragment  
359 amplified from pDSW2035 with primers P2446 and P2447, and an 804 bp fragment  
360 amplified from pDSW2031 with primers P2448 and P2449.  
361

362 pDSW2091. Amplify the *ftsN* (E60-Halo) sandwich fusion from pDSW2083 using primers  
363 P2422 and P2460. P2422 introduces a D5N amino acid substitution. The 2009 bp product  
364 was digested with AflIII and KpnI, then ligated into the same sites of pDSW2035.  
365

366 pDSW2099. Obtain a 946 bp *dsbA*<sup>ss</sup>-Halo fragment from pJL074 by digestion with AflIII  
367 and Accl. This fragment was ligated into the same sites of pDSW2083.  
368

369 pDSW2105. Amplify a fragment of the *ftsN*(E60-Halo) sandwich fusion from pDSW2083  
370 with primers P2182 and P2525. The 1357 bp PCR product encodes *ftsN* residues 1-73, a  
371 Halo tag inserted between *ftsN* residues 60-61, followed by *ftsN* residues 61-73. This DNA  
372 fragment was digested with AflIII and KpnI, then ligated into the same sites of pDSW2035.  
373

374 pDSW2109. Amplify part of the *ftsN*<sup>D5N</sup> (E60-Halo) sandwich fusion from pDSW2091 using  
375 primers P2182 and P2525. The 1357 bp product was digested with AflIII and KpnI, then  
376 ligated into the same sites of pDSW2035.  
377

378 pJL033. Amplify *Halo* gene from the chromosome of strain JM136 which contains the  
379 sandwich *Halo-ftsI* gene<sup>13</sup> with primers 19 and 20. Amplify *ftsN* gene with the vector  
380 backbone from pJL015 with primers 13 and 72. The two DNA fragments were then joined  
381 by the In-Fusion Cloning Kit to generate plasmid pJL033 (P<sub>T5-lac</sub>::*Halo-ftsN*, Amp<sup>r</sup>).  
382

383 pJL069. Amplify *Halo* gene with the vector backbone from pDSW1920 (P<sub>204\_7A</sub>:: *Halo-ftsN*  
384 *lacI*<sup>Q\*</sup> *oriR<sub>v</sub>* *attP<sub>Φ80</sub>* Spc<sup>r</sup>) with primers 89 and 90. Amplify *ftsN*<sup>243-319</sup> gene from pJL028 with  
385 primers 66 and 92. The two DNA fragments were then joined by the In-Fusion Cloning Kit  
386 to generate plasmid pJL069 (P<sub>204\_7A</sub>:: *Halo-ftsN*<sup>243-319</sup> *lacI*<sup>Q\*</sup> *oriR<sub>v</sub>* *attP<sub>Φ80</sub>* Spc<sup>r</sup>).  
387

388 pJL074. The pJL074 (P<sub>204\_7A</sub>:: *dsbA*<sup>ss</sup>-*Halo-ftsN*<sup>243-319</sup> *lacI*<sup>Q\*</sup> *oriR<sub>v</sub>* *attP<sub>Φ80</sub>* Spc<sup>r</sup>) plasmid was  
389 constructed from the pJL069 plasmid using the QuikChange protocol (Agilent) with the  
390 primers 111 and 112 to insert the *dsbA*<sup>ss</sup> gene in front of *Halo* gene.  
391

392 pJL098. Amplify the vector backbone from pJL015 ( $P_{T5-lac}::mEos3.2-ftsN$ )<sup>4</sup> with primers  
393 13 and 72. Amplify *ftsN* gene from pJL015 with primers 127 and 128. The two DNA  
394 fragments were then joined by the In-Fusion Cloning Kit to generate plasmid pJL098 ( $P_{T5-}$   
395  $lac::ftsN$ , Amp<sup>r</sup>).

396

397 pJL019. Amplify *ftsN* gene with the vector backbone from pJL015 with primers 13 and 72.  
398 Amplify *mNeonGreen* gene from pXY677 ( $P_{T5-lac}::mNeonGreen-zapA$ )<sup>5</sup> with primers 11  
399 and 12. The two DNA fragments were then joined by the In-Fusion Cloning Kit to generate  
400 plasmid pJL019 ( $P_{T5-lac}::mNG-ftsN$ ).

401

402 pJL107. Amplify *ftsN*<sup>12-13</sup> gene with the vector backbone from pJL098 with primers 148  
403 and 149. Amplify *mNeonGreen* gene from pJL019 with primers 150 and 151. The two DNA  
404 fragments were then joined by the In-Fusion Cloning Kit to generate plasmid pJL107 ( $P_{T5-}$   
405  $lac::ftsN(P12-A13)-mNG^{SW}$ ).

406

407 pJL103. Amplify *ftsN*<sup>28-29</sup> gene with the vector backbone from pJL098 with primers 141  
408 and 142. Amplify *mNeonGreen* gene from pJL019 with primers 143 and 144. The two DNA  
409 fragments were then joined by the In-Fusion Cloning Kit to generate plasmid pJL103 ( $P_{T5-}$   
410  $lac::ftsN(N28-L29)-mNG^{SW}$ ).

411

412 pJL108. Amplify *ftsN*<sup>60-61</sup> gene with the vector backbone from pJL098 with primers 152  
413 and 153. Amplify *mNeonGreen* gene from pJL019 with primers 154 and 155. The two DNA  
414 fragments were then joined by the In-Fusion Cloning Kit to generate plasmid pJL108 ( $P_{T5-}$   
415  $lac::ftsN(E60-E61)-mNG^{SW}$ ).

416

417 pJL109. Amplify *ftsN*<sup>69-70</sup> gene with the vector backbone from pJL098 with primers 156  
418 and 157. Amplify *mNeonGreen* gene from pJL019 with primers 158 and 159. The two DNA  
419 fragments were then joined by the In-Fusion Cloning Kit to generate plasmid pJL109 ( $P_{T5-}$   
420  $lac::ftsN(K69-V70)-mNG^{SW}$ ).

421

422 pJL110. Amplify *ftsN*<sup>113-114</sup> gene with the vector backbone from pJL098 with primers 160  
423 and 161. Amplify *mNeonGreen* gene from pJL019 with primers 162 and 163. The two DNA  
424 fragments were then joined by the In-Fusion Cloning Kit to generate plasmid pJL110 ( $P_{T5-}$   
425  $lac::ftsN(Q113-L114)-mNG^{SW}$ ).

426

427 pJL111. Amplify *ftsN*<sup>151-152</sup> gene with the vector backbone from pJL098 with primers 164  
428 and 165. Amplify *mNeonGreen* gene from pJL019 with primers 166 and 167. The two DNA  
429 fragments were then joined by the In-Fusion Cloning Kit to generate plasmid pJL111 ( $P_{T5-}$   
430  $lac::ftsN(Q124-M125)-mNG^{SW}$ ).

431

432 pJL100. Amplify *ftsN*<sup>124-125</sup> gene with the vector backbone from pJL098 with primers 129  
433 and 130. Amplify *mNeonGreen* gene from pJL019 with primers 131 and 132. The two DNA  
434 fragments were then joined by the In-Fusion Cloning Kit to generate plasmid pJL100 ( $P_{T5-}$   
435  $lac::ftsN(Q151-T152)-mNG^{SW}$ ).

436

437 pJL101. Amplify *ftsN*<sup>182-183</sup> gene with the vector backbone from pJL098 with primers 133  
438 and 134. Amplify *mNeonGreen* gene from pJL019 with primers 135 and 136. The two DNA

439 fragments were then joined by the In-Fusion Cloning Kit to generate plasmid pJL101 ( $P_{T5}$ -  
440  $lac::ftsN(Q182-T183)-mNG^{SW}$ ).  
441  
442 pJL102. Amplify  $ftsN^{212-213}$  gene with the vector backbone from pJL098 with primers 137  
443 and 138. Amplify *mNeonGreen* gene from pJL019 with primers 139 and 140. The two DNA  
444 fragments were then joined by the In-Fusion Cloning Kit to generate plasmid pJL102 ( $P_{T5}$ -  
445  $lac::ftsN(Q212-T213)-mNG^{SW}$ ).  
446  
447 pJL028. Amplify *ftsN* gene with the vector backbone from pJL015 with primers 13 and 72.  
448 Amplify *mNeonGreen* gene from pJL019 with primers 39 and 40. The two DNA fragments  
449 were then joined by the In-Fusion Cloning Kit to generate plasmid pJL028 ( $P_{T5-lac::ftsN}$ -  
450 *mNG*).  
451  
452 pJL112. Amplify  $ftsN^{151-152}$  gene with the vector backbone from pJL098 with primers 170  
453 and 171. Amplify *Halo* gene from pJL033 with primers 172 and 173. The two DNA  
454 fragments were then joined by the In-Fusion Cloning Kit to generate plasmid pJL113 ( $P_{T5}$ -  
455  $lac::ftsN(Q151-T152)-Halo^{SW}$ ,  $Amp^r$ ).  
456  
457 pJL113. Amplify  $ftsN^{60-61}$  gene with the vector backbone from pJL098 with primers 152  
458 and 153. Amplify *Halo* gene from pJL033 with primers 177 and 178. The two DNA  
459 fragments were then joined by the In-Fusion Cloning Kit to generate plasmid pJL113 ( $P_{T5}$ -  
460  $lac::ftsN(E60-E61)-Halo^{SW}$ ,  $Amp^r$ ).  
461  
462 pJL119. Amplify the vector backbone from pXY027 ( $P_{T5-lac::ftsZ-GFP}$ ,  $Cam^r$ )<sup>20</sup> with primers  
463 72 and 126. Amplify *ftsN* gene from pJL015 with primers 127 and 128. The two DNA  
464 fragments were then joined by the In-Fusion Cloning Kit to generate plasmid pJL119 ( $P_{T5}$ -  
465  $lac::ftsN$ ,  $Cam^r$ ).  
466  
467 pJL123. Amplify  $ftsN^{243-319}$  gene with the vector backbone from pJL119 with primers 72  
468 and 106. Amplify *dsbA<sup>SS</sup>* gene from pJL074 with primers 181 and 183. The two DNA  
469 fragments were then joined by the In-Fusion Cloning Kit to generate plasmid pJL123 ( $P_{T5}$ -  
470  $lac::dsbA^{SS}-ftsN^{243-319}$ ,  $Cam^r$ ).  
471  
472 pJL132. Amplify  $ftsN^{60-61}$  gene with the vector backbone from pJL119 with primers 152  
473 and 153. Amplify *Halo* gene from pJL113 with primers 177 and 178. The two DNA  
474 fragments were then joined by the In-Fusion Cloning Kit to generate plasmid pJL132 ( $P_{T5}$ -  
475  $lac::ftsN(E60-E61)-Halo^{SW}$ ,  $Cam^r$ ).  
476  
477 pJL133. The pJL133 ( $P_{T5-lac::ftsN(E60-E61), WYAA}-Halo^{SW}$ ,  $Cam^r$ ) plasmid was  
478 constructed from the pJL132 plasmid using the QuikChange protocol (Agilent) with the  
479 primers 60 and 61 to mutate the nucleotide sequence encoding for W83A, Y85A.  
480  
481 pJL135. Amplify *dsbA<sup>SS</sup>* gene with the vector backbone from pJL123 with primers 116 and  
482 126. Amplify  $ftsN^{61-105}$  gene from pJL119 with primers 184 and 187. The two DNA  
483 fragments were then joined by the In-Fusion Cloning Kit to generate plasmid pJL135 ( $P_{T5}$ -  
484  $lac::dsbA^{SS}-ftsN^{61-105}$ ,  $Cam^r$ ).  
485

486 pJL136. Amplify *dsbA<sup>SS</sup>* gene and *ftsN<sup>61-105</sup>* gene with the vector backbone from pJL123  
487 with primers 116 and 152. Amplify *Halo* gene from pJL113 with primers 76 and 178. The  
488 two DNA fragments were then joined by the In-Fusion Cloning Kit to generate plasmid  
489 pJL136 ( $P_{T5-lac}::dsbA^{SS}$ -*Halo*-*ftsN<sup>61-105</sup>*, Cam<sup>r</sup>).

**Supplementary Table 3. Oligonucleotides used in this study.**

| <b>Name</b> | <b>Sequence (5'→3')</b>                                                           | <b>Comment</b>                                                                                                            |
|-------------|-----------------------------------------------------------------------------------|---------------------------------------------------------------------------------------------------------------------------|
| P760        | CGGGATCCGGTGGTCTGTACTTCATTACG                                                     | Forward primer to clone <i>ftsN</i> periplasmic domain into pQE-80L                                                       |
| P761        | CCCAAGCTTTCAACCCCCGGCGGCGAGCCG                                                    | Reverse primer to clone <i>ftsN</i> periplasmic domain into pQE-80L                                                       |
| P2108       | CTCCAATTGGCGATGGCCCTGTCCT                                                         | Forward primer to clone <i>gfp-ftsN</i> into pDSW534                                                                      |
| P2109       | GATGAGCTCTCAACCCCCGGCGGCGAG                                                       | Reverse primer to clone <i>gfp-ftsN</i> into pDSW534                                                                      |
| P2163       | CAGCTTAAGACACAGGAAACAGACCATGAGTGCGAT<br>TAAGCCAG                                  | Forward primer to clone <i>mEos3.2</i> into pDSW1866                                                                      |
| P2164       | CTGCAATTGCTGCAGGTGCGACTCTAGAGGATCCCC<br>GGGTACCGAGCTCGAATTCTCGTCTGGCATTGTCAG<br>G | Reverse primer to clone <i>mEos3.2</i> into pDSW1866                                                                      |
| P2178       | CCAGAATTCATCAACAAGTTTGTACAAAAAAGCAGG<br>CTC                                       | Forward primer to clone <i>ftsN</i> into pDSW1884                                                                         |
| P2179       | TGGGGATCCTCAACCCCCGGCGGCGAG                                                       | Reverse primer to clone <i>ftsN</i> into pDSW1884                                                                         |
| P2182       | CTGTCTACTCTGGAGATTTCCGGTGGTGGCGGTGG<br>TAGTGCGGAGAAAAAAGACGAACGC                  | Forward primer to clone <i>ftsN</i> <sup>Cyto-TM</sup> and <i>ftsN</i> <sup>D5N-Cyto-TM</sup> into pDSW2035               |
| P2222       | CAATTCTTAAGACACAGGAAACAGACCATGGTGAGC<br>AAAGGCGAAGAAG                             | Forward primer to clone <i>mNeonGreen</i> into pDSW1890                                                                   |
| P2223       | GTGGAATTCTTTATACAGTTCATCCATGCCATC                                                 | Reverse primer to clone <i>mNeonGreen</i> into pDSW1890                                                                   |
| P2225       | GTGGAATTCACCGGAAATCTCCAGAGTAG                                                     | Reverse primer to clone <i>halo</i> into pDSW1890                                                                         |
| P2228       | CAATTCTTAAGACACAGGAAACAGACCATGGCAGAA<br>ATCGGTAAGGCTTTCCATTC                      | Forward primer to clone <i>halo</i> into pDSW1890                                                                         |
| P2392       | CACCTTAAGACACAGGAAACAGACC<br>ATGGCACAACGAGATTATGTAC                               | Forward primer to clone <i>ftsN</i> sandwich fusions into pDSW1876                                                        |
| P2393       | CACGGGATCCTTAACCCCCGGCGG                                                          | Reverse primer to clone <i>ftsN</i> sandwich fusions into pDSW1876                                                        |
| P2394       | CACGAGATCTTTAACCCCCGGCGG                                                          | Alternative reverse primer to clone sandwich fusions into pDSW1876                                                        |
| P2422       | CAATTCTTAAGACACAGGAAACAGACCATGGCACAA<br>CGAAATTATGTACGCCG                         | Forward primer to clone <i>ftsN</i> <sup>D5N</sup> - <i>Halo</i> <sup>SW</sup> into pDSW2035; introduces D5N substitution |

|       |                                                             |                                                                                                                     |
|-------|-------------------------------------------------------------|---------------------------------------------------------------------------------------------------------------------|
| P2439 | GAGCGGATAACAATTCTTAAGACACAGGAAACAGAC<br>CATGGC              | Forward primer for<br>constructing <i>ftsN-Halo</i> <sup>SW</sup><br>plasmid                                        |
| P2445 | TTTCGGATCCGCTACCACCGCCACCTTC                                | Reverse primer for<br>constructing <i>ftsN-Halo</i> <sup>SW</sup><br>plasmid                                        |
| P2446 | CGGTGGTAGCGGATCCGAAATCGGTACTGGCT                            | Forward primer for<br>constructing <i>ftsN-Halo</i> <sup>SW</sup><br>plasmid                                        |
| P2447 | CACCGCCACCACCGGAAATCTCCAGAGTAGACAGC                         | Reverse primer for<br>constructing <i>ftsN-Halo</i> <sup>SW</sup><br>plasmid                                        |
| P2448 | GATTTCCGGTGGTGGCGGTGGTAGCGAGTCC                             | Forward primer for<br>constructing <i>ftsN-Halo</i> <sup>SW</sup><br>plasmid                                        |
| P2449 | AACATGAGAATTCGAGCTCGGTACCCGGGGATCCTT<br>AACCCCGG            | Reverse primer for<br>constructing <i>ftsN-Halo</i> <sup>SW</sup><br>plasmid                                        |
| P2460 | CTAGAGGATCCCGTGGAAAAATGTGACTTTTATCAC                        | Forward primer to clone<br><i>ftsN</i> <sup>D5N</sup> - <i>Halo</i> <sup>SW</sup> into<br>pDSW2035                  |
| P2525 | CTCGGTACCCGGGGATCCTTAGTTTCCGGTCACTTT<br>CTGGCTTTG           | Reverse primer to clone<br><i>ftsN</i> <sup>Cyto-TM</sup> and <i>ftsN</i> <sup>D5N-Cyto-<br/>TM</sup> into pDSW2035 |
| 11    | GGAGAAATTA ACTACTAGTATGGTGAGCAAAGGCGA<br>AGAAG              | Forward primer to clone<br><i>mNG</i> into pJL019                                                                   |
| 12    | GCTTTTTTTGTACAAACTTGTTGATTTTATACAGTTCAT<br>CCATGCCCATC      | Reverse primer to clone<br><i>mNG</i> into pJL019                                                                   |
| 13    | ATCAACAAGTTTGTACAAAAAAGCAGG                                 | Forward primer to<br>amplify <i>ftsN</i> -vector<br>fragment for pJL019 and<br>pJL033                               |
| 19    | GAGGAGAAATTA ACTACTAGTATGGGATCCGAAATC<br>GGTACTG            | Forward primer to clone<br><i>halo</i> into pJL033                                                                  |
| 20    | GAGCCTGCTTTTTTTGTACAAACTTGTTGATACCGGA<br>AATCTCCAGAGTAGAC   | Reverse primer to clone<br><i>halo</i> into pJL033                                                                  |
| 39    | AAAAGCAGGCTCCGCGGCCGCCCTTCACCAAGT<br>GAGCAAAGGCGAAGAAGATAAC | Forward primer to clone<br><i>mNG</i> into pJL028                                                                   |
| 40    | GGCTGCAGGTCGACCCTTAGCGGCCGCTTATTATA<br>CAGTTCATCCATGCCCATC  | Reverse primer to clone<br><i>mNG</i> into pJL028                                                                   |
| 60    | CCAGAAGAACGCGCTCGCGCCATTAAGAGCTG                            | Forward primer for site-<br>specific mutagenesis into<br>WYAA for pJL133                                            |
| 61    | CAGCTCTTTAATGGCGCGAGCGGTTCTTCTGG                            | Reverse primer for site-<br>specific mutagenesis into<br>WYAA for pJL133                                            |
| 66    | CCGCCCCCTTCACCAAAAAGACGAACGCCGCTGGA<br>TGG                  | Forward primer to clone<br><i>ftsN</i> <sup>243-319</sup> into pJL069                                               |
| 72    | ACTAGTAGTTAATTTCTCCTCTTTAATG                                | Reverse primer to<br>amplify vector fragment                                                                        |

|     |                                                                      |                                                                                            |
|-----|----------------------------------------------------------------------|--------------------------------------------------------------------------------------------|
|     |                                                                      | for pJL019, pJL033, pJL109 and pJL123                                                      |
| 76  | CTGGCTGGTTTAGTTTTAGCGTTTAGCGCATCGGCG<br>GGATCCGAAATCGGTAAGTGG        | Forward primer to clone <i>halo</i> into pJL136                                            |
| 89  | TTGGTGAAGGGGGCGGCC                                                   | Forward primer to amplify <i>halo</i> -vector fragment for pJL069                          |
| 90  | GGATCCTCTAGAGTCGACCT                                                 | Reverse primer to amplify <i>Halo</i> -vector fragment for pJL069                          |
| 92  | GGTCGACTCTAGAGGATCCTCAACCCCCGGCGGCG                                  | Reverse primer to clone <i>ftsN</i> <sup>243-319</sup> into pJL069                         |
| 106 | AAAGACGAACGCCGCTGGATGG                                               | Forward primer to amplify <i>ftsN</i> <sup>243-319</sup> -vector fragment for pJL123       |
| 111 | CTGGCTGGTTTAGTTTTAGCGTTTAGCGCATCGGCG<br>GCAGAAATCGGTAAGTGGCTTTC      | Forward primer to clone <i>dsbA</i> <sup>ss</sup> into pJL074                              |
| 112 | GCTAAACTAAACCAGCCAGCGCCAGCCAAATCTTT<br>TTCATGGTCTGTTTCCTGTGTCTTAAGAA | Reverse primer to clone <i>dsbA</i> <sup>ss</sup> into pJL074                              |
| 116 | CGCCGATGCGCTAAACGCT                                                  | Reverse primer to amplify <i>dsbA</i> <sup>ss</sup> -vector fragment for pJL135 and pJL136 |
| 126 | GCGGCCGCTAAGGGTCCG                                                   | Forward primer to amplify vector fragment for pJL119 and pJL135                            |
| 127 | GAGGAGAAATTAAGTACTAGTATGGCACAACGAGAT<br>TATGTACGC                    | Forward primer to clone <i>ftsN</i> into pJL098 and pJL119                                 |
| 128 | GACCCTTAGCGGCCGCTTAACCCCCGGCGGCGAGC                                  | Reverse primer to clone <i>ftsN</i> into pJL098 and pJL119                                 |
| 129 | GCTACCACCGCCACCTTGCTGACGCTGTTCCGGC                                   | Forward primer to amplify <i>ftsN</i> <sup>151-152</sup> -vector fragment for pJL100       |
| 130 | GGTGGCGGTGGTAGCACGCTACAGCGCCAACGTC                                   | Reverse primer to amplify <i>ftsN</i> <sup>151-152</sup> -vector fragment for pJL100       |
| 131 | GCGTCAGCAAGGTGGCGGTGGTAGCGTGAGCAAAG<br>GCGAAGAAGATAAC                | Forward primer to clone <i>mNG</i> into pJL100                                             |
| 132 | GTAGCGTGCTACCACCGCCACCTTTATACAGTTCAT<br>CCATGCCATC                   | Reverse primer to clone <i>mNG</i> into pJL100                                             |
| 133 | GCTACCACCGCCACCTGCTGCTGCCAGCTTTGTTC                                  | Forward primer to amplify <i>ftsN</i> <sup>182-183</sup> -vector fragment for pJL101       |
| 134 | GGTGGCGGTGGTAGCACGCGTACGTCGCAAGCCG                                   | Reverse primer to amplify <i>ftsN</i> <sup>182-183</sup> -vector fragment for pJL101       |
| 135 | CAGCAGCAGGGTGGCGGTGGTAGCGTGAGCAAAG<br>GCGAAGAAGATAAC                 | Forward primer to clone <i>mNG</i> into pJL101                                             |



|     |                                                       |                                                                                                        |
|-----|-------------------------------------------------------|--------------------------------------------------------------------------------------------------------|
| 136 | CGTACGCGTGCTACCACCGCCACCTTTATACAGTTC<br>ATCCATGCCCATC | Reverse primer to clone<br><i>mNG</i> into pJL101                                                      |
| 137 | GCTACCACCGCCACCTTGCAGCAGATCCTGGTACG<br>G              | Forward primer to<br>amplify <i>ftsN</i> <sup>12-213</sup> -vector<br>fragment for pJL102              |
| 138 | GGTGGCGGTGGTAGCACTCCTGCGCACACGACTGC                   | Reverse primer to<br>amplify <i>ftsN</i> <sup>12-213</sup> -vector<br>fragment for pJL102              |
| 139 | CTGCAAGGTGGCGGTGGTAGCGTGAGCAAAGGCGA<br>AGAAGATAAC     | Forward primer to clone<br><i>mNG</i> into pJL102                                                      |
| 140 | CGCAGGAGTGCTACCACCGCCACCTTTATACAGTTC<br>ATCCATGCCCATC | Reverse primer to clone<br><i>mNG</i> into pJL102                                                      |
| 141 | GCTACCACCGCCACCATTTCGTTGCTTTTTCCGTGA<br>GGTG          | Forward primer to<br>amplify <i>ftsN</i> <sup>28-29</sup> -vector<br>fragment for pJL103               |
| 142 | GGTGGCGGTGGTAGCCTGCCTGCGGTTTCTCCCG                    | Reverse primer to<br>amplify <i>ftsN</i> <sup>28-29</sup> -vector<br>fragment for pJL103               |
| 143 | GCAACGAAATGGTGGCGGTGGTAGCGTGAGCAAAG<br>GCGAAGAAGATAAC | Forward primer to clone<br><i>mNG</i> into pJL103                                                      |
| 144 | GCAGGCAGGCTACCACCGCCACCTTTATACAGTTCA<br>TCCATGCCCATC  | Reverse primer to clone<br><i>mNG</i> into pJL103                                                      |
| 148 | GGTGGCGGTGGTAGCGCACCTTCGCGGGCGAAAAA<br>G              | Forward primer to<br>amplify <i>ftsN</i> <sup>12-13</sup> -vector<br>fragment for pJL107               |
| 149 | GCTACCACCGCCACCCGGTTGGCTGCGGGCGTACA                   | Reverse primer to<br>amplify <i>ftsN</i> <sup>12-13</sup> -vector<br>fragment for pJL107               |
| 150 | CCAACCGGGTGGCGGTGGTAGCGTGAGCAAAGGC<br>GAAGAAGATAAC    | Forward primer to clone<br><i>mNG</i> into pJL107                                                      |
| 151 | CGAAGGTGCGCTACCACCGCCACCTTTATACAGTTC<br>ATCCATGCCCATC | Reverse primer to clone<br><i>mNG</i> into pJL107                                                      |
| 152 | GGTGGCGGTGGTAGCGAGTCCGAGACGCTGCAA<br>G                | Forward primer to<br>amplify <i>ftsN</i> <sup>60-61</sup> -vector<br>fragment for pJL108 and<br>pJL136 |
| 153 | GCTACCACCGCCACCTTCTTTCTTGTGATGCGTAAT<br>GAAGTAC       | Reverse primer to<br>amplify <i>ftsN</i> <sup>60-61</sup> -vector<br>fragment for pJL108               |
| 154 | CAAGAAAGAAGGTGGCGGTGGTAGCGTGAGCAAAG<br>GCGAAGAAGATAAC | Forward primer to clone<br><i>mNG</i> into pJL108                                                      |
| 155 | CGGACTCGCTACCACCGCCACCTTTATACAGTTCAT<br>CCATGCCCATC   | Reverse primer to clone<br><i>mNG</i> into pJL108                                                      |
| 156 | GGTGGCGGTGGTAGCGTGACCGGAAACGGACTACC                   | Forward primer to<br>amplify <i>ftsN</i> <sup>69-70</sup> -vector<br>fragment for pJL109               |
| 157 | GCTACCACCGCCACCTTTCTGGCTTTGCAGCGTCTC<br>G             | Reverse primer to<br>amplify <i>ftsN</i> <sup>69-70</sup> -vector<br>fragment for pJL109               |

|     |                                                            |                                                                                      |
|-----|------------------------------------------------------------|--------------------------------------------------------------------------------------|
| 158 | CCAGAAAGGTGGCGGTGGTAGCGTGAGCAAAGGC<br>GAAGAAGATAAC         | Forward primer to clone <i>mNG</i> into pJL109                                       |
| 159 | GGTCACGCTACCACCGCCACCTTTATACAGTTCATC<br>CATGCCCATC         | Reverse primer to clone <i>mNG</i> into pJL109                                       |
| 160 | GGTGGCGGTGGTAGCCTGACACCAGAACAACGTCA<br>GC                  | Forward primer to amplify <i>ftsN</i> <sup>113-114</sup> -vector fragment for pJL110 |
| 161 | GCTACCACCGCCACCTTGCTCCGGCGTTTTCACTTC<br>AC                 | Reverse primer to amplify <i>ftsN</i> <sup>113-114</sup> -vector fragment for pJL110 |
| 162 | CGGAGCAAGGTGGCGGTGGTAGCGTGAGCAAAGG<br>CGAAGAAGATAAC        | Forward primer to clone <i>mNG</i> into pJL110                                       |
| 163 | GTGTCAGGCTACCACCGCCACCTTTATACAGTTCAT<br>CCATGCCCATC        | Reverse primer to clone <i>mNG</i> into pJL110                                       |
| 164 | GGTGGCGGTGGTAGCATGCAGGCTGATATGCGCCA<br>G                   | Forward primer to amplify <i>ftsN</i> <sup>124-125</sup> -vector fragment for pJL111 |
| 165 | GCTACCACCGCCACCTTGTTCAAGAAGCTGACGTTG<br>TTCTG              | Reverse primer to amplify <i>ftsN</i> <sup>124-125</sup> -vector fragment for pJL111 |
| 166 | GAACAAGGTGGCGGTGGTAGCGTGAGCAAAGGCGA<br>AGAAGATAAC          | Forward primer to clone <i>mNG</i> into pJL111                                       |
| 167 | CCTGCATGCTACCACCGCCACCTTTATACAGTTCAT<br>CCATGCCCATC        | Reverse primer to clone <i>mNG</i> into pJL111                                       |
| 170 | GCTACCACCGCCACCTTGC                                        | Forward primer to amplify <i>ftsN</i> <sup>151-152</sup> -vector fragment for pJL112 |
| 171 | GGTGGCGGTGGTAGCACG                                         | Reverse primer to amplify <i>ftsN</i> <sup>151-152</sup> -vector fragment for pJL112 |
| 172 | GCGTCAGCAAGGTGGCGGTGGTAGCGGATCCGAAA<br>TCGGTACTGGC         | Forward primer to clone <i>halo</i> into pJL112                                      |
| 173 | GCTGTAGCGTGCTACCACCGCCACCACCGGAAATC<br>TCCAGAGTAGAC        | Reverse primer to clone <i>halo</i> into pJL112                                      |
| 177 | CAAGAAAGAAGGTGGCGGTGGTAGCGGATCCGAAA<br>TCGGTACTGGC         | Forward primer to clone <i>Halo</i> into pJL132                                      |
| 178 | CTCGGACTCGCTACCACCGCCACCACCGGAAATCT<br>CCAGAGTAGAC         | Reverse primer to clone <i>Halo</i> into pJL132 and pJL136                           |
| 181 | CATTAAAGAGGAGAAATTAATACTACTAGTATGAAAAAG<br>ATTTGGCTGGCGCTG | Forward to clone <i>dsbA</i> <sup>SS</sup> into pJL123                               |
| 183 | CTGCACCATCCAGCGGCGTTCGTCTTTCGCCGATG<br>CGCTAAACGCTAA       | Reverse primer to clone <i>dsbA</i> <sup>SS</sup> into pJL123                        |
| 184 | GTTTAGTTTTAGCGTTTAGCGCATCGGCGGAGTCCG<br>AGACGCTGCAAAGC     | Forward primer to clone <i>ftsN</i> <sup>61-105</sup> into pJL135                    |
| 187 | CTGCAGGTCGACCCTTAGCGGCCGCTTAACCGGCA<br>GAAGGTTCTGTG        | Reverse primer to clone <i>ftsN</i> <sup>61-105</sup> into pJL135                    |

491  
492  
493

494

**Supplementary Table 4. Summary of different FtsN fusions.**

| Construction        | Insertion site                                     | Complem entation  | Doubling time (hr) | Localization        |
|---------------------|----------------------------------------------------|-------------------|--------------------|---------------------|
| MG1655 <sup>a</sup> | N.A. <sup>b</sup>                                  | N.A. <sup>b</sup> | 1.7 ± 0.1          | Midcell             |
| mEos3.2-FtsN        | N-terminus                                         | Yes               | N.D. <sup>c</sup>  | Midcell             |
| mNG-FtsN            | N-terminus                                         | Yes               | 1.5 ± 0.1          | Midcell             |
| P12-mNG-A13         | Within FtsN <sup>Cyto</sup>                        | Yes               | 1.8 ± 0.1          | Midcell, weak       |
| N28-mNG-L29         |                                                    | Partially         | 2.5 ± 0.3          | Midcell, very weak  |
| E60-mNG-E61         | Between FtsN <sup>TM</sup> and FtsN <sup>E</sup>   | Yes               | 1.5 ± 0.1          | Midcell             |
| K69-mNG-V70         |                                                    | Yes               | 1.5 ± 0.1          | Midcell             |
| Q113-mNG-L114       | Between FtsN <sup>E</sup> and FtsN <sup>SPOR</sup> | Yes               | 2.0 ± 0.1          | Midcell & Cell pole |
| Q124-mNG-M125       |                                                    | Yes               | 1.6 ± 0.1          | Midcell & Cell pole |
| Q151-mNG-T152       |                                                    | Yes               | 1.6 ± 0.1          | Midcell & Cell pole |
| Q182-mNG-T183       |                                                    | Yes               | 1.5 ± 0.1          | Midcell & Cell pole |
| Q212-mNG-T213       |                                                    | Yes               | 1.6 ± 0.2          | Midcell & Cell pole |
| FtsN-mNG            | C-terminus                                         | Yes               | 1.4 ± 0.1          | Midcell & Cell pole |

495

496 All the experiments were performed with cells grown in M9-glucose minimal medium.

497 <sup>a</sup> This is MG1655 wild-type strain. Localization data was from the immunostaining  
498 fluorescence images.499 <sup>b</sup> N.A. not applicable.500 <sup>c</sup> N.D. not measured.

501

502

503

504

505

506

507

508

509

510

511

512

513

514

515 **Supplementary Table 5. FtsN-ring and FtsZ-ring dimension measurements.**

| Strains                   | Deconvolved ring width FWHM (nm) <sup>b</sup> | Deconvolved ring thickness FWHM (nm) <sup>b</sup> | <i>n</i> <sup>c</sup> |
|---------------------------|-----------------------------------------------|---------------------------------------------------|-----------------------|
| mEos3.2-FtsN              | 86 ± 3                                        | 51 ± 4                                            | 72                    |
| FtsZ-mEos3.2 <sup>a</sup> | 84 ± 2                                        | 47 ± 2                                            | 103                   |

516

517 All the experiments were performed with cells grown in M9-glucose minimal medium.

518 <sup>a</sup> FtsZ-mEos3.2 data was from a previous work<sup>4</sup>.

519 <sup>b</sup> The FWHM was deconvolved as previously described<sup>21</sup>, which allows comparison of  
520 dimensions obtained with different spatial resolutions.

521 <sup>c</sup> *n* is the number of cells used in each measurement.

522

523

524

525

526

527

528

529

530

531

532

533

534

535

536

537

538

539

540

541

542

543 **Supplementary Table 6. Comparison of the moving speed across different**  
 544 **divisome proteins.**

| Proteins <sup>b</sup> | Imaging Modality | $P_1\_V_1$ (%) <sup>c</sup> | $V_1$ (nm s <sup>-1</sup> ) <sup>c</sup> | $V_2$ (nm s <sup>-1</sup> ) <sup>c</sup> |
|-----------------------|------------------|-----------------------------|------------------------------------------|------------------------------------------|
| FtsN                  | TIRF             | 100                         | 8.7 ± 0.2                                | N.A. <sup>a</sup>                        |
|                       | SMT              | 100                         | 9.5 ± 0.2                                | N.A. <sup>a</sup>                        |
| FtsW                  | SMT              | 63.6 ± 7.6                  | 9.4 ± 0.3                                | 37.8 ± 6.1                               |
| FtsI                  | SMT              | 53.9 ± 19.9                 | 9.8 ± 1.1                                | 31.2 ± 5.6                               |
| FtsZ                  | TIRF             | 0                           | N.A. <sup>a</sup>                        | 28.0 ± 1.2                               |

545

546 All the experiments were performed with cells grown in M9-glucose minimal medium.

547 <sup>a</sup> N.A. not applicable

548 <sup>b</sup> FtsN data is from this study, where TIRF data is the combination of TIRF and TIRF-SIM  
 549 imaging of the mNG-FtsN fusion (Strain 4564 in Supplementary Table 1), SMT data is  
 550 from SMT imaging of the FtsN-Halo<sup>SW</sup> fusion (Strain 5234 in Supplementary Table 1).  
 551 FtsW data is from SMT imaging of a FtsW-RFP fusion in a previous study<sup>5</sup>. FtsI data is  
 552 from SMT imaging of an RFP-FtsI fusion from a previous study<sup>5</sup>. FtsZ data is from TIRF  
 553 imaging of an FtsZ-GFP fusion in a previous study<sup>6</sup>.

554 <sup>c</sup> Speeds of FtsN ( $V_1$ ) and FtsZ ( $V_2$ ) from the TIRF data were calculated as the average of  
 555 the absolute speeds. Errors are the *s.e.m.* with  $n > 200$ . Percentage ( $P_1\_V_1$ ), speed ( $V_1$ )  
 556 of the slow-moving population and speed ( $V_2$ ) of the fast-moving population from the SMT  
 557 data of FtsN, FtsW, and FtsI are obtained from one-population (FtsN) or two-population  
 558 (FtsW, FtsI) free-float fitting of 200 CDF curves bootstrapped from three independent  
 559 experiments. Errors are the standard deviations of the fitted parameters.

560

561

562

563

564

565

566

567

568

569

570

571

572

573

574

575 **Supplementary Table 7. FtsN dynamics in cells with different FtsZ**  
 576 **treadmilling speeds.**

| FtsZ mutants | FtsZ speed <sup>a</sup><br>(nm s <sup>-1</sup> ) ( <i>N<sub>Z</sub></i> ) | <i>P</i> <sub>moving</sub> <sup>b</sup><br>(%) ( <i>N<sub>all</sub></i> ) | FtsN speed <sup>b</sup><br>(nm s <sup>-1</sup> ) | <i>T</i> <sub>moving</sub> <sup>c</sup><br>(s) ( <i>N<sub>m</sub></i> ) | <i>T</i> <sub>stationary</sub> <sup>c</sup><br>(s) ( <i>N<sub>s</sub></i> ) |
|--------------|---------------------------------------------------------------------------|---------------------------------------------------------------------------|--------------------------------------------------|-------------------------------------------------------------------------|-----------------------------------------------------------------------------|
| WT           | 28.0 ± 1.2<br>(182)                                                       | 44.0 ± 1.3<br>(161)                                                       | 9.6 ± 0.4                                        | 16.4 ± 1.1<br>(71)                                                      | 32.9 ± 3.8<br>(90)                                                          |
| E238A        | 23.8 ± 2.9<br>(37)                                                        | 43.1 ± 1.7<br>(149)                                                       | 10.5 ± 0.4                                       | 15.6 ± 1.6<br>(64)                                                      | 20.8 ± 1.8<br>(85)                                                          |
| E250A        | 17.4 ± 1.6<br>(41)                                                        | 43.9 ± 1.6<br>(285)                                                       | 9.3 ± 0.3                                        | 19.3 ± 1.2<br>(125)                                                     | 32.1 ± 2.5<br>(160)                                                         |
| D269A        | 14.3 ± 1.3<br>(32)                                                        | 41.8 ± 1.5<br>(219)                                                       | 9.4 ± 0.3                                        | 17.9 ± 1.1<br>(92)                                                      | 34.3 ± 3.0<br>(127)                                                         |
| G105S        | 9.7 ± 1.0<br>(35)                                                         | 42.5 ± 1.8<br>(189)                                                       | 10.0 ± 0.4                                       | 14.4 ± 0.8<br>(80)                                                      | 37.8 ± 4.4<br>(109)                                                         |

577

578 All the experiments were performed with cells grown in M9-glucose minimal medium.

579 <sup>a</sup> FtsZ treadmilling speeds were calculated as the average of the absolute speeds from a  
 580 previous work<sup>6</sup>. Data are presented as mean ± *s.e.m.* *N<sub>Z</sub>* is the number of FtsZ kymograph  
 581 segments.

582 <sup>b</sup> Percentage of segment number (*P*<sub>moving</sub>) and average speed of FtsN molecules spent  
 583 in directional moving state. Data are presented as mean ± error, where the error is the  
 584 standard deviation from 200 bootstrap samples pooled from three independent  
 585 experiments. *N<sub>all</sub>* is the number of total track segments.

586 <sup>c</sup> Average dwell time of FtsN molecules spent in directional moving state (*T*<sub>moving</sub>) and  
 587 stationary state (*T*<sub>stationary</sub>). Data are presented as mean ± *s.e.m.* *N<sub>m</sub>* is the number of  
 588 segments corresponding to a directionally moving molecule. *N<sub>s</sub>* is the number of segments  
 589 corresponding to a stationary molecule.

590

591

592

593

594

595

596

597

598

599

600

601

602

603 **Supplementary Table 8. Dynamics of FtsN's cytoplasmic domain mutants.**

| FtsN mutant              | $P_{\text{moving}}^a$<br>(%) ( $N_{\text{all}}$ ) | FtsN speed <sup>a</sup><br>(nm s <sup>-1</sup> ) | $T_{\text{moving}}^b$<br>(s) ( $N_m$ ) | $T_{\text{stationary}}^b$<br>(s) ( $N_s$ ) |
|--------------------------|---------------------------------------------------|--------------------------------------------------|----------------------------------------|--------------------------------------------|
| FtsN <sup>D5N</sup>      | 43.1 ± 2.4 (202)                                  | 9.7 ± 0.4                                        | 11.4 ± 0.6 (87)                        | 17.7 ± 1.8 (115)                           |
| FtsN <sup>ΔCyto-TM</sup> | 40.5 ± 1.6 (234)                                  | 9.2 ± 0.3                                        | 10.5 ± 0.6 (94)                        | 27.7 ± 2.5 (140)                           |

604

605 All the experiments were performed with cells grown in M9-glucose minimal medium.

606 <sup>a</sup> Percentage of segment number ( $P_{\text{moving}}$ ) and average speed of FtsN mutant  
607 molecules spent in directional moving state. Data are presented as mean ± error, where  
608 the error is the standard deviation from 200 bootstrap samples pooled from three  
609 independent experiments.  $N_{\text{all}}$  is the number of total track segments.

610 <sup>b</sup> Average dwell time of FtsN mutant molecules spent in directional moving state  
611 ( $T_{\text{moving}}$ ) and stationary state ( $T_{\text{stationary}}$ ). Data are presented as mean ± *s.e.m.*  $N_m$   
612 is the number of segments corresponding to a directionally moving molecule.  $N_s$  is the  
613 number of segments corresponding to a stationary molecule.

614

615

616

617

618

619

620

621

622

623

624

625

626

627

628

629

630

631

632

633

634

635 **Supplementary Table 9. FtsN<sup>Cyto-TM</sup> dynamics in cells with different FtsZ**  
 636 **treadmilling speeds.**

| FtsZ mutants | FtsZ speed <sup>a</sup><br>(nm s <sup>-1</sup> ) ( <i>N<sub>Z</sub></i> ) | <i>P</i> _moving <sup>b</sup><br>(%) ( <i>N<sub>all</sub></i> ) | FtsN <sup>Cyto-TM</sup><br>speed <sup>b</sup><br>(nm s <sup>-1</sup> ) | <i>T</i> _moving <sup>c</sup><br>(s) ( <i>N<sub>m</sub></i> ) | <i>T</i> _stationary <sup>c</sup><br>(s) ( <i>N<sub>s</sub></i> ) |
|--------------|---------------------------------------------------------------------------|-----------------------------------------------------------------|------------------------------------------------------------------------|---------------------------------------------------------------|-------------------------------------------------------------------|
| WT           | 28.0 ± 1.2<br>(182)                                                       | 62.5 ± 1.9<br>(130)                                             | 29.1 ± 1.7                                                             | 7.5 ± 0.4<br>(81)                                             | 18.4 ± 1.6<br>(49)                                                |
| E238A        | 23.8 ± 2.9<br>(37)                                                        | 59.5 ± 3.1<br>(108)                                             | 26.4 ± 1.5                                                             | 7.7 ± 0.4<br>(64)                                             | 15.6 ± 1.3<br>(44)                                                |
| E250A        | 17.4 ± 1.6<br>(41)                                                        | 54.8 ± 3.0<br>(96)                                              | 21.7 ± 1.2                                                             | 7.1 ± 0.4<br>(53)                                             | 12.8 ± 0.7<br>(43)                                                |
| D269A        | 14.3 ± 1.3<br>(32)                                                        | 45.1 ± 3.1<br>(104)                                             | 15.8 ± 0.7                                                             | 7.3 ± 0.5<br>(47)                                             | 19.5 ± 2.0<br>(57)                                                |
| G105S        | 9.7 ± 1.0<br>(35)                                                         | 37.5 ± 2.0<br>(197)                                             | 10.9 ± 0.5                                                             | 8.5 ± 0.5<br>(74)                                             | 12.5 ± 0.9<br>(123)                                               |

637

638 All the experiments were performed with cells grown in M9-glucose minimal medium.

639 <sup>a</sup> FtsZ treadmilling speeds were calculated as the average of the absolute speeds from  
 640 previous work<sup>6</sup>. Data are presented as mean ± *s.e.m.* *N<sub>Z</sub>* is the number of FtsZ kymograph  
 641 segments.

642 <sup>b</sup> Percentage of segment number (*P*\_moving) and average speed of FtsN<sup>Cyto-TM</sup> molecules  
 643 spent in directional moving state. Data are presented as mean ± error, where the error is  
 644 the standard deviation from 200 bootstrap samples pooled from three independent  
 645 experiments. *N<sub>all</sub>* is the number of total track segments.

646 <sup>c</sup> Average dwell time of FtsN<sup>Cyto-TM</sup> molecules spent in directional moving state (*T*\_moving)  
 647 and stationary state (*T*\_stationary). Data are presented as mean ± *s.e.m.* *N<sub>m</sub>* is the number  
 648 of segments corresponding to a directionally moving molecule. *N<sub>s</sub>* is the number of  
 649 segments corresponding to a stationary molecule.

650

651

652

653

654

655

656

657

658

659

660

661



662  
663

**Supplementary Table 10. FtsN dynamics under different sPG synthesis conditions.**

| Genotype                                | Drug or medium             | $P_{\text{moving}}^a$<br>(%) ( $N_{\text{all}}$ ) | FtsN speed <sup>a</sup><br>(nm s <sup>-1</sup> ) | $T_{\text{moving}}^b$<br>(s) ( $N_m$ ) | $T_{\text{stationary}}^b$<br>(s) ( $N_s$ ) |
|-----------------------------------------|----------------------------|---------------------------------------------------|--------------------------------------------------|----------------------------------------|--------------------------------------------|
| BW25113                                 | M9-glucose                 | 44.1 ± 2.2<br>(161)                               | 9.6 ± 0.4                                        | 16.4 ± 1.1<br>(71)                     | 32.9 ± 3.8<br>(90)                         |
|                                         | MTSES,<br>M9-glucose       | 42.1 ± 1.5<br>(176)                               | 9.2 ± 0.4                                        | 16.2 ± 1.3<br>(74)                     | 28.3 ± 1.5<br>(102)                        |
| BW25113,<br><i>ftsW</i> <sup>302C</sup> | M9-glucose                 | 43.7 ± 1.3<br>(155)                               | 9.6 ± 0.5                                        | 13.8 ± 1.0<br>(68)                     | 26.3 ± 1.5<br>(87)                         |
|                                         | MTSES,<br>M9-glucose       | 19.6 ± 1.4<br>(143)                               | 9.5 ± 0.5                                        | 12.7 ± 0.9<br>(28)                     | 24.1 ± 2.9<br>(115)                        |
| MG1655                                  | M9-glucose                 | 44.9 ± 1.6<br>(571)                               | 9.4 ± 0.2                                        | 14.5 ± 0.7<br>(256)                    | 27.3 ± 1.3<br>(315)                        |
|                                         | Aztreonam,<br>M9-glucose   | 10.3 ± 0.9<br>(760)                               | 7.9 ± 0.5                                        | 19.2 ± 1.1<br>(79)                     | 42.5 ± 1.2<br>(681)                        |
|                                         | Fosfomycin,<br>M9-glucose  | 9.9 ± 1.8<br>(374)                                | 9.7 ± 0.5                                        | 15.2 ± 0.9<br>(37)                     | 40.9 ± 1.8<br>(337)                        |
|                                         | 1XPBS<br>(4% PFA<br>fixed) | 5.2 ± 0.9<br>(856)                                | 9.1 ± 0.6                                        | 15.4 ± 1.0<br>(44)                     | 73.7 ± 2.3<br>(812)                        |
| MG1655,<br><i>ftsI</i> <sup>R167S</sup> | M9-glucose                 | 45.8 ± 2.0<br>(375)                               | 9.4 ± 0.3                                        | 16.0 ± 0.7<br>(173)                    | 18.5 ± 0.7<br>(202)                        |
|                                         | EZRDM                      | 48.9 ± 1.0<br>(154)                               | 12.3 ± 0.5                                       | 13.8 ± 0.5<br>(75)                     | 14.4 ± 0.8<br>(79)                         |
|                                         | EZRDM +<br>UppS            | 49.2 ± 1.7<br>(140)                               | 13.7 ± 0.5                                       | 13.2 ± 0.8<br>(69)                     | 12.8 ± 0.5<br>(71)                         |

664

665 <sup>a</sup> Percentage of segment number ( $P_{\text{moving}}$ ) and average speed of FtsN molecules spent  
666 in directional moving state. Data are presented as mean ± error, where the error is the  
667 standard deviation from 200 bootstrap samples pooled from three independent  
668 experiments.  $N_{\text{all}}$  is the number of total track segments.

669 <sup>b</sup> Average dwell time of FtsN molecules spent in directional moving state ( $T_{\text{moving}}$ ) and  
670 stationary state ( $T_{\text{stationary}}$ ). Data are presented as mean ± s.e.m.  $N_m$  is the number of  
671 segments corresponding to a directionally moving molecule.  $N_s$  is the number of segments  
672 corresponding to a stationary molecule.

673

674

675

676

677

678

679

680 **Supplementary Table 11. The  $p$ -values of the two-sample Kolmogorov-**  
681 **Smirnov (K-S) test for FtsN and FtsW's directional movement.**

| Growth condition | $p$                |                                           |                                    |
|------------------|--------------------|-------------------------------------------|------------------------------------|
|                  | Speed ( $V$ )      | Moving dwell time ( $T_{\text{moving}}$ ) | Processive running length ( $PL$ ) |
| EZRDM            | 0.214 <sup>a</sup> | 0.074 <sup>a</sup>                        | 0.369 <sup>a</sup>                 |
| EZRDM + UppS     | 0.051 <sup>a</sup> | 0.052 <sup>a</sup>                        | 0.108 <sup>a</sup>                 |

682

683 <sup>a</sup> The  $p$ -values indicate the distributions are not significantly different from each other ( $p >$   
684 0.05).

685

686

687

688

689

690

691

692

693

694

695

696

697

698

699

700

701

702

703

704

705

706 **Supplementary Table 12. Dynamics of FtsN mutants in the superfission**  
 707 **strain.**

| Genotype                                                      | Plasmid              | $P_{\text{moving}}^b$<br>(%) ( $N_{\text{all}}$ ) | $P_1\_V_1^c$<br>(%) | $V_1^{b,c}$<br>(nm s <sup>-1</sup> ) | $V_2^c$<br>(nm s <sup>-1</sup> ) | $T_{\text{moving}}^d$<br>(s) ( $N_m$ ) | $T_{\text{stationary}}^d$<br>(s) ( $N_s$ ) |
|---------------------------------------------------------------|----------------------|---------------------------------------------------|---------------------|--------------------------------------|----------------------------------|----------------------------------------|--------------------------------------------|
| TB28,<br>$\Delta ftsN$ ,<br>$ftsB^{E56A}$                     | FtsN <sup>WT</sup>   | 44.0 ± 1.8<br>(285)                               | 100                 | 9.3 ±<br>0.3                         | N.A. <sup>a</sup>                | 14.8 ± 0.8<br>(125)                    | 31.2 ± 2.0<br>(160)                        |
|                                                               | FtsN <sup>WYAA</sup> | 11.0 ± 2.1<br>(252)                               | 100                 | 13.6 ±<br>1.3                        | N.A. <sup>a</sup>                | 10.9 ± 0.7<br>(28)                     | 21.4 ± 1.4<br>(224)                        |
|                                                               | FtsN <sup>E</sup>    | 62.9 ± 1.2<br>(202)                               | 29.8 ±<br>13.7      | 8.4 ±<br>1.9                         | 28.8 ±<br>6.3                    | 9.1 ± 0.5<br>(127)                     | 14.1 ± 0.9<br>(75)                         |
| TB28,<br>$\Delta ftsN$ ,<br>$ftsB^{E56A}$ ,<br>$ftsZ^{E250A}$ | FtsN <sup>E</sup>    | 55.3 ± 1.1<br>(217)                               | 40.0 ±<br>11.3      | 8.6 ±<br>1.6                         | 24.1 ±<br>1.8                    | 9.6 ± 0.5<br>(120)                     | 18.8 ± 1.1<br>(97)                         |
| TB28,<br>$\Delta ftsN$ ,<br>$ftsB^{E56A}$ ,<br>$ftsZ^{G105S}$ |                      | 40.8 ± 0.9<br>(255)                               | 41.5 ±<br>27.9      | 8.0 ±<br>2.5                         | 11.5 ±<br>3.4                    | 12.5 ± 0.7<br>(104)                    | 21.6 ± 1.4<br>(151)                        |

708

709 All the experiments were performed with cells grown in M9-glucose minimal medium.

710 <sup>a</sup> N.A. not applicable

711 <sup>b</sup> Percentage of segment number ( $P_{\text{moving}}$ ) and average speed ( $V_1$ ) of FtsN or FtsN  
 712 mutant molecules spent in directional moving state. Data are presented as mean ± error,  
 713 where the error is the standard deviation from 200 bootstrap samples pooled from three  
 714 independent experiments.  $N_{\text{all}}$  is the number of total track segments.

715 <sup>c</sup> Percentage ( $P_1\_V_1$ ), speed ( $V_1$ ) of the slow-moving population and speed ( $V_2$ ) of the fast-  
 716 moving population of FtsN<sup>E</sup> molecules obtained from two-population free-float fitting of  
 717 CDF curves bootstrapped 200 times from three independent experiments. Errors are the  
 718 standard deviations of the fitted parameters.

719 <sup>d</sup> Average dwell time of FtsN or FtsN mutant molecules spent in directional moving state  
 720 ( $T_{\text{moving}}$ ) and stationary state ( $T_{\text{stationary}}$ ). Data are presented as mean ± s.e.m.  $N_m$   
 721 is the number of segments corresponding to a directionally moving molecule.  $N_s$  is the  
 722 number of segments corresponding to a stationary molecule.

723

724

725

726

727

728

729

730

731

- 733 1. Yang, J.C., Van Den Ent, F., Neuhaus, D., Brevier, J. & Lowe, J. Solution  
734 structure and domain architecture of the divisome protein FtsN. *Mol. Microbiol.*  
735 **52**, 651-660 (2004).
- 736 2. Coltharp, C., Buss, J., Plumer, T.M. & Xiao, J. Defining the rate-limiting  
737 processes of bacterial cytokinesis. *Proc. Natl Acad. Sci. USA* **113**, 1044-1053  
738 (2016).
- 739 3. Fu, G. *et al.* In vivo structure of the E. coli FtsZ-ring revealed by photoactivated  
740 localization microscopy (PALM). *PloS one* **5**, e12682 (2010).
- 741 4. Lyu, Z., Coltharp, C., Yang, X. & Xiao, J. Influence of FtsZ GTPase activity and  
742 concentration on nanoscale Z-ring structure in vivo revealed by three-  
743 dimensional Superresolution imaging. *Biopolymers* **105**, 725-734 (2016).
- 744 5. Yang, X. *et al.* A two-track model for the spatiotemporal coordination of bacterial  
745 septal cell wall synthesis revealed by single-molecule imaging of FtsW. *Nat.*  
746 *Microbiol.* **6**, 584-593 (2021).
- 747 6. Yang, X. *et al.* GTPase activity-coupled treadmilling of the bacterial tubulin FtsZ  
748 organizes septal cell wall synthesis. *Science* **355**, 744-747 (2017).
- 749 7. Guyer, M.S., Reed, R.R., Steitz, J.A. & Low, K.B. Identification of a sex-factor-  
750 affinity site in E. coli as gamma delta. *Cold Spring Harb. Symp. Quant. Biol.* **45 Pt**  
751 **1**, 135-140 (1981).
- 752 8. Baba, T. *et al.* Construction of *Escherichia coli* K-12 in-frame, single-gene  
753 knockout mutants: the Keio collection. *Mol. Syst. Biol.* **2**, 2006 0008 (2006).
- 754 9. Arends, S.J. & Weiss, D.S. Inhibiting cell division in *Escherichia coli* has little if  
755 any effect on gene expression. *J. Bacteriol.* **186**, 880-884 (2004).
- 756 10. Tarry, M. *et al.* The *Escherichia coli* cell division protein and model Tat substrate  
757 SufI (FtsP) localizes to the septal ring and has a multicopper oxidase-like  
758 structure. *J. Mol. Biol.* **386**, 504-519 (2009).
- 759 11. Chen, J.C. & Beckwith, J. FtsQ, FtsL and FtsI require FtsK, but not FtsN, for co-  
760 localization with FtsZ during *Escherichia coli* cell division. *Mol. Microbiol.* **42**, 395-  
761 413 (2001).
- 762 12. Liu, B., Persons, L., Lee, L. & de Boer, P.A. Roles for both FtsA and the FtsBLQ  
763 subcomplex in FtsN-stimulated cell constriction in *Escherichia coli*. *Mol.*  
764 *Microbiol.* **95**, 945-970 (2015).
- 765 13. McCausland, J.W. *et al.* Treadmilling FtsZ polymers drive the directional  
766 movement of sPG-synthesis enzymes via a Brownian ratchet mechanism. *Nat.*  
767 *Commun.* **12**, 609 (2021).
- 768 14. Haldimann, A. & Wanner, B.L. Conditional-replication, integration, excision, and  
769 retrieval plasmid-host systems for gene structure-function studies of bacteria. *J.*  
770 *Bacteriol.* **183**, 6384-6393 (2001).
- 771 15. Weiss, D.S., Chen, J.C., Ghigo, J.M., Boyd, D. & Beckwith, J. Localization of FtsI  
772 (PBP3) to the septal ring requires its membrane anchor, the Z ring, FtsA, FtsQ,  
773 and FtsL. *J. Bacteriol.* **181**, 508-520 (1999).
- 774 16. Jones-Carson, J. *et al.* Nitric oxide disrupts bacterial cytokinesis by poisoning  
775 purine metabolism. *Sci. Adv.* **6**, eaaz0260 (2020).
- 776 17. Wissel, M.C. & Weiss, D.S. Genetic analysis of the cell division protein FtsI  
777 (PBP3): amino acid substitutions that impair septal localization of FtsI and  
778 recruitment of FtsN. *J. Bacteriol.* **186**, 490-502 (2004).
- 779 18. Arends, S.J. *et al.* Discovery and characterization of three new *Escherichia coli*  
780 septal ring proteins that contain a SPOR domain: DamX, DedD, and RlpA. *J.*  
781 *Bacteriol.* **192**, 242-255 (2010).

- 782 19. Williams, K.B. *et al.* Nuclear magnetic resonance solution structure of the  
783 peptidoglycan-binding SPOR domain from *Escherichia coli* DamX: insights into  
784 septal localization. *Biochemistry* **52**, 627-639 (2013).
- 785 20. Buss, J. *et al.* A multi-layered protein network stabilizes the *Escherichia coli* FtsZ-  
786 ring and modulates constriction dynamics. *PLoS Genet.* **11**, e1005128 (2015).
- 787 21. Coltharp, C., Yang, X. & Xiao, J. Quantitative analysis of single-molecule  
788 superresolution images. *Curr. Opin. Struct. Biol.* **28**, 112-121 (2014).

789

790

791

792

793

794

795

796

797

798

799

800

801

802

803

804

805

806

807

808

809

810

811

812

813

814 **Uncropped scans of all blots and gels**

815

816

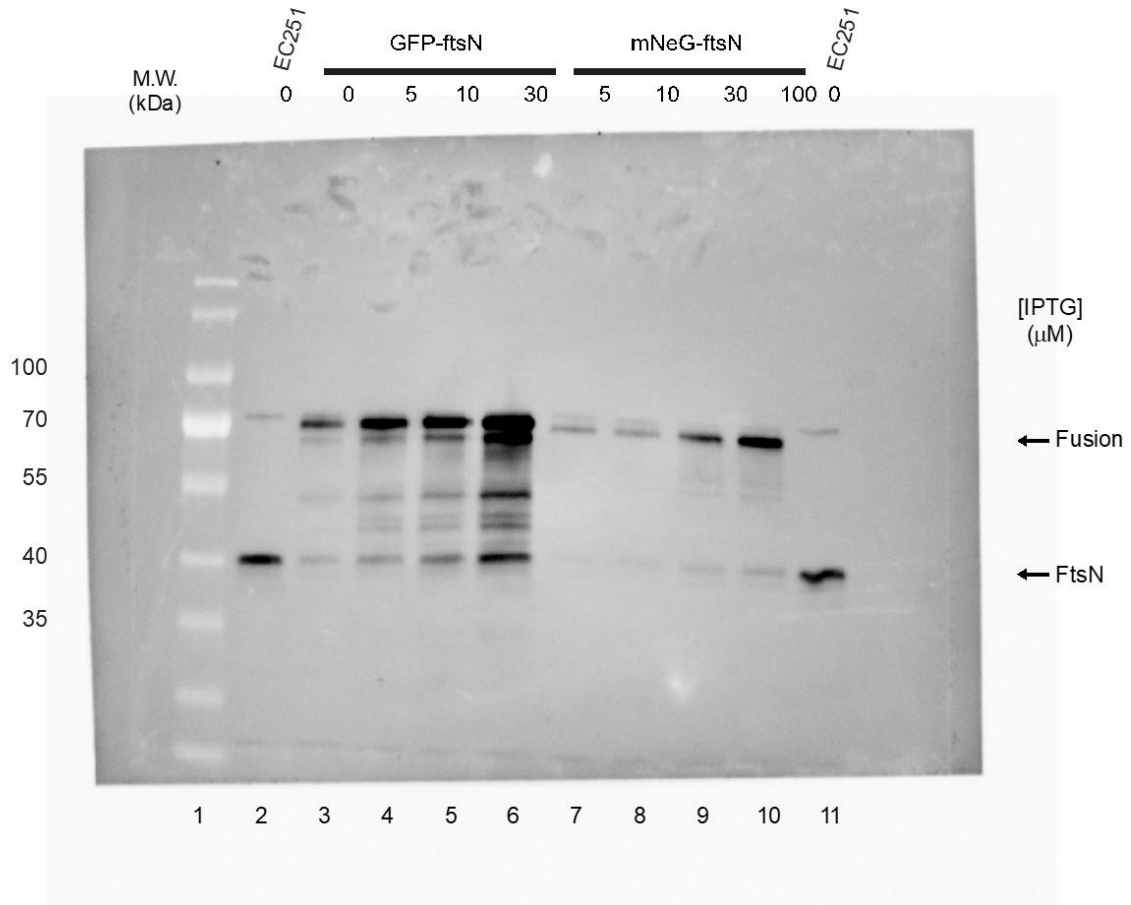

817

818

Supplemental Figure 4A

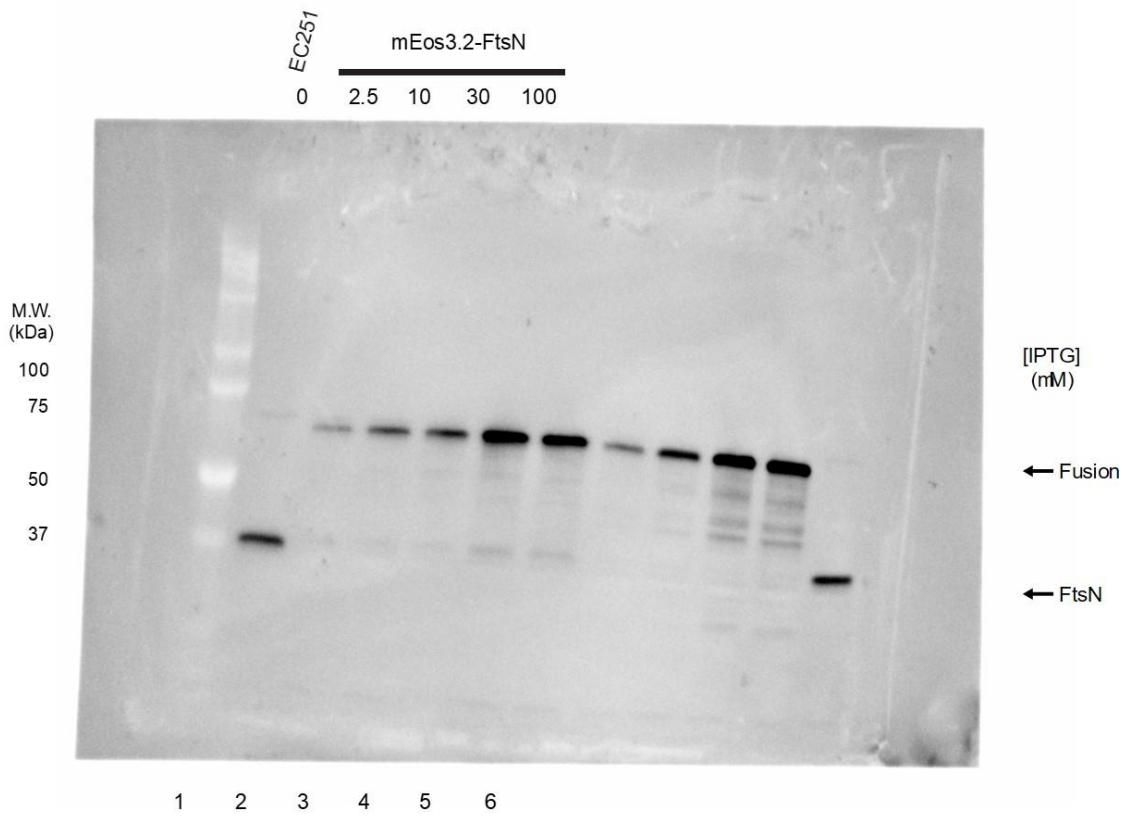

819

820

Supplemental Figure 4B

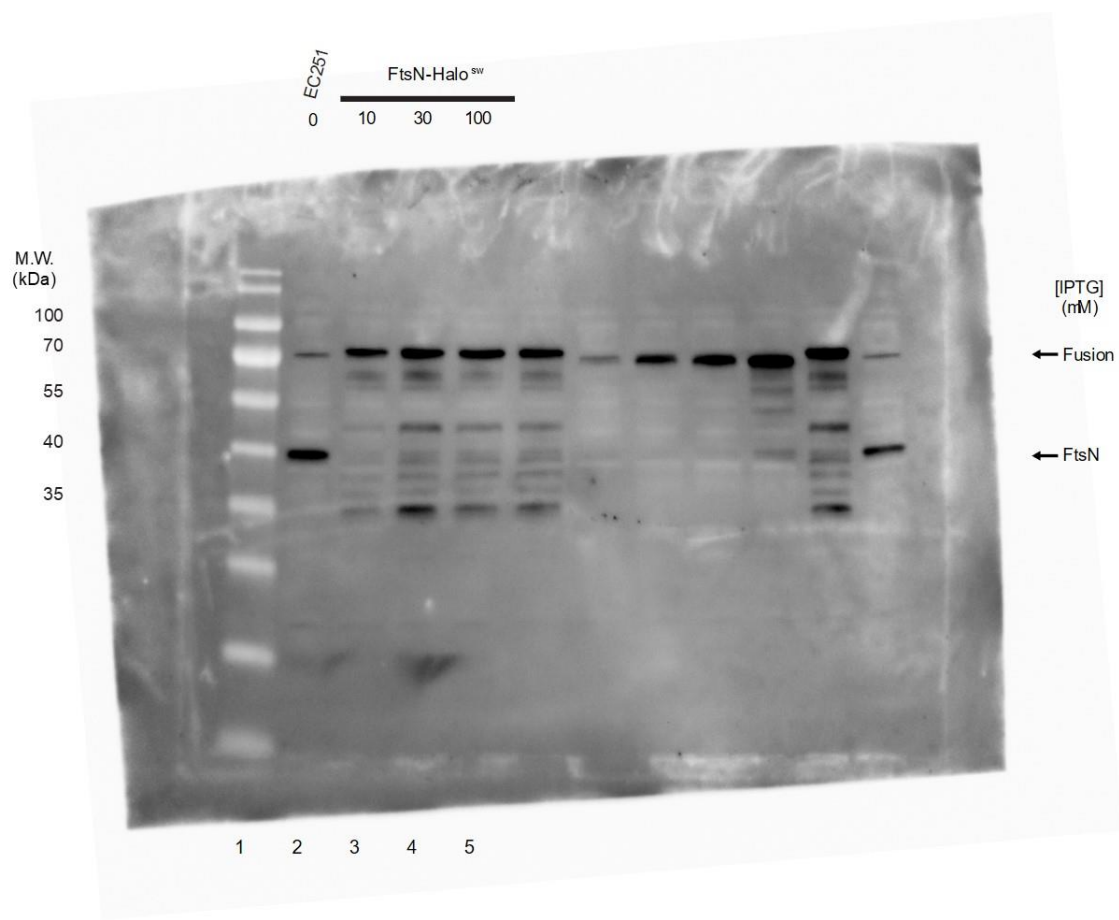

821

822

Supplemental Figure 4C



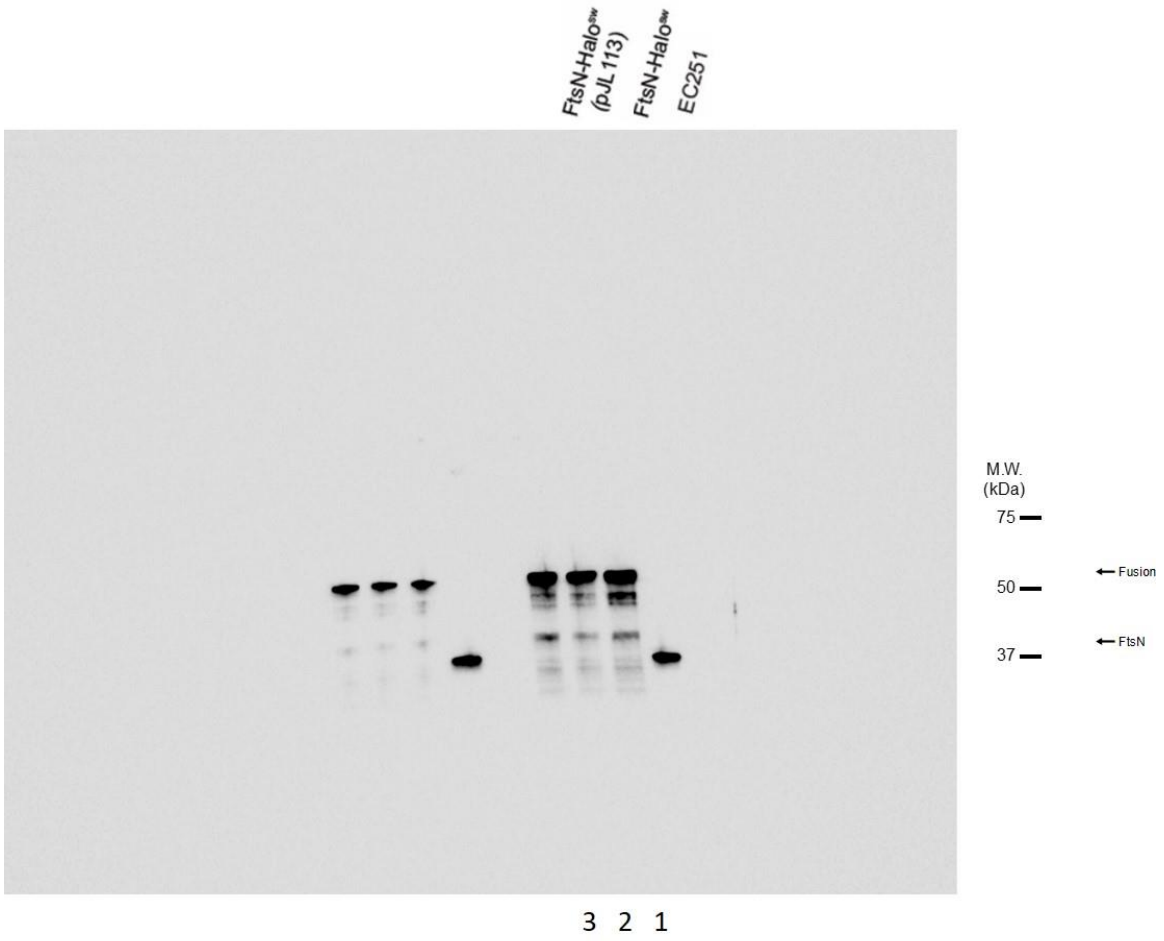

823

824

Supplemental Figure 4D

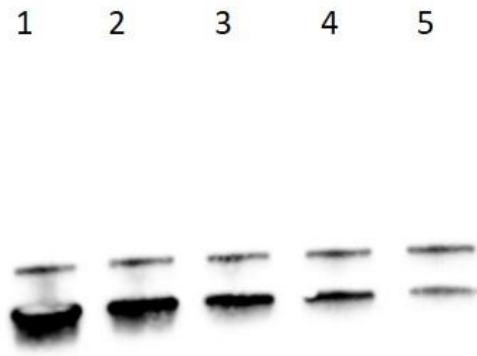

825  
826  
827  
828  
829  
830

Supplemental Figure 5A

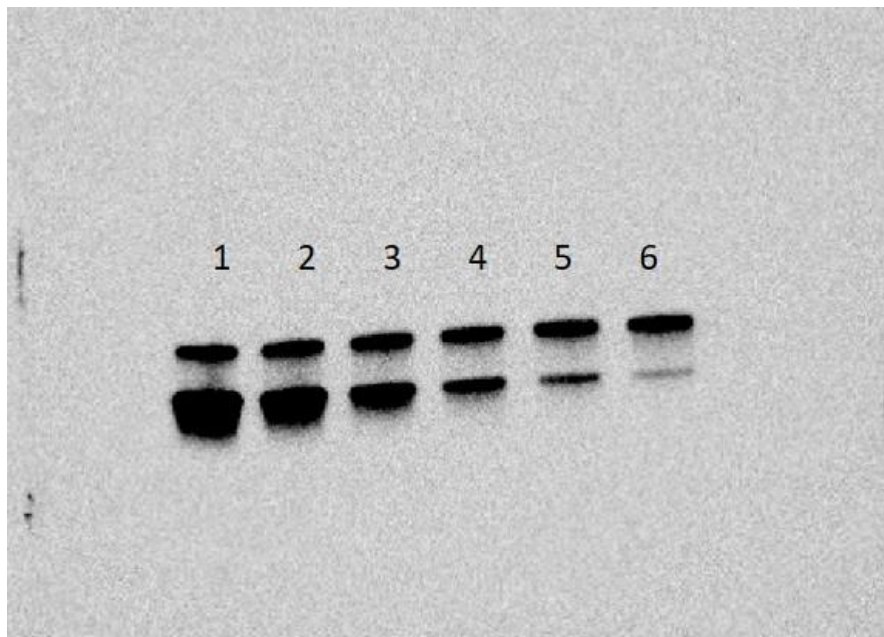

831  
832

Supplemental Figure 5B

833

834

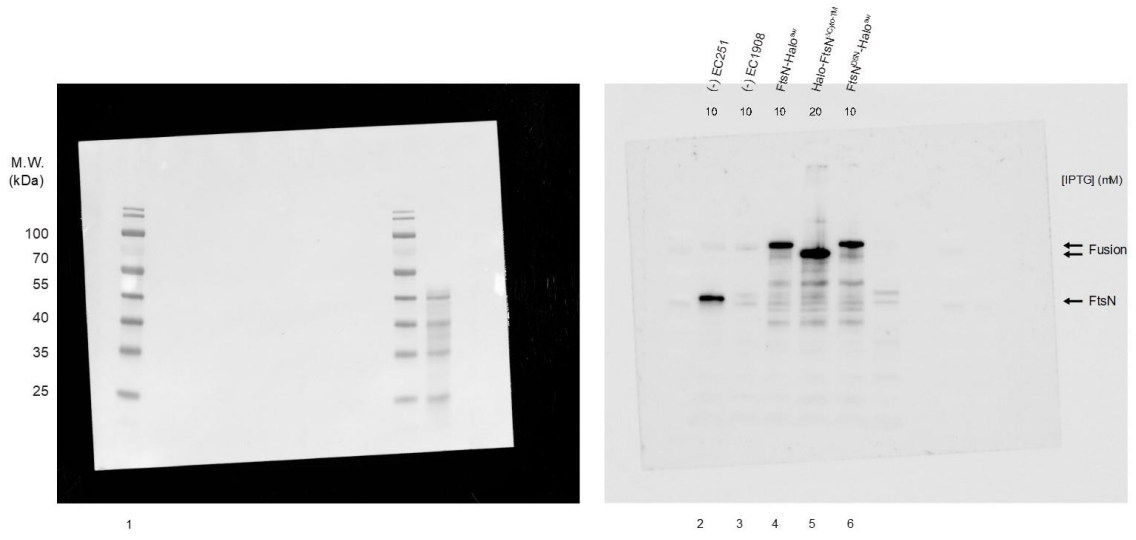

835

836

837

Supplemental Figure 11A
