# Supplementary material for: FtsN maintains active septal cell wall synthesis by forming a processive complex with the septum-specific peptidoglycan synthases in E. coli
Source: PubMed Central journal article supplement (PMC9525312; doi:10.1038/s41467-022-33404-8), 2022-09-30
Supplement: 41467_2022_33404_MOESM3_ESM.pdf [file 41467_2022_33404_MOESM3_ESM.pdf]

## 1 **Description of Additional Supplementary Information**

### 2 3 **Supplementary Movie 1. Time-lapse FRAP imaging of GFP-FtsN fusion cells.**

4 Half of the ring in the cell on the right was bleached (cyan arrow). The cell on the left  
5 served as a control (yellow arrowhead). Images were acquired every 1 s for 150 s after  
6 photobleaching, with a 50-ms exposure time. Scale bars, 500 nm.

### 7 8 **Supplementary Movie 2. Time-lapse TIRF-SIM imaging of a mNG-FtsN fusion cell.**

9 Images were acquired every 1 s for 40 s, with a 50-ms exposure time. Scale bars, 500 nm.

### 10 11 **Supplementary Movie 3. SMT imaging of a cell with an immobile JF646-FtsN-Halo<sup>SW</sup>** 12 **molecule.**

13 Images were acquired every 1 s for 150 s, with a 100-ms exposure time. Scale bars, 500  
14 nm.

### 15 16 **Supplementary Movie 4. SMT imaging of a cell with a processively moving JF646-** 17 **FtsN-Halo<sup>SW</sup> molecule.**

18 Images were acquired every 1 s for 150 s, with a 100-ms exposure time. Scale bars, 500  
19 nm.

### 20 21 **Supplementary Movie 5. SMT imaging of a cell with a JF646-FtsN-Halo<sup>SW</sup> molecule** 22 **switching between the stationary state and moving state with different speeds.**

23 Images were acquired every 1 s for 150 s, with a 100-ms exposure time. Scale bars, 500  
24 nm.

25
